# Supplementary material for: Based on Multi-Activity Integrated Strategy to Screening, Characterization and Quantification of Bioactive Compounds from Red Wine
Source: MDPI journal article supplement (doi:10.3390/molecules26216750), 2021-11-08
Supplement: s1 [file s1]

# Supplementary Materials

Article

## Based on multi-activity integrated strategy to screening, characterization and quantification of bioactive compounds from red wine

Yuye Gao<sup>1,a</sup>, Xie-an Yu<sup>2,a</sup>, Bing Wang<sup>2</sup>, Guo Yin<sup>2</sup>, Jue Wang<sup>2</sup>, Tiejie Wang<sup>2,\*</sup> and Kaishun Bi<sup>1,\*</sup>

<sup>1</sup> School of Pharmacy, Shenyang Pharmaceutical University, Shenyang, Liaoning 110016, China

<sup>2</sup> NMPA Key Laboratory for Quality Research and Evaluation of Traditional Chinese Medicine, Shenzhen Institute for Drug Control, Shenzhen 518057, China

\* Correspondence: kaishunbi.syphu@gmail.com

<sup>a</sup> These authors contributed equally.

**Table S1.** Origin and varietal of the wines.

| Samples | Vintage | Vol (%) | Cultivar(s)        | Location                                                |
|---------|---------|---------|--------------------|---------------------------------------------------------|
| S1      | 2015    | 13.5    | Cabernet Sauvignon | Maipo Vallay, Chile                                     |
| S2      | 2018    | 13      | Cabernet Sauvignon | the central valley of Chile                             |
| S3      | 2018    | 13.5    | Cabernet Sauvignon | Maipo Vallay, Chile                                     |
| S4      | 2018    | 13.5    | Cabernet Sauvignon | Maipo Vallay and Aconcagua Valley, Chile                |
| S5      | 2017    | 13.5    | Cabernet Sauvignon | Aconcagua Valley, Chile                                 |
| S6      | 2018    | 13.8    | Cabernet Sauvignon | Mendoza, Argentina                                      |
| S7      | 2015    | 14.5    | Cabernet Sauvignon | Mendoza, Argentina                                      |
| S8      | 2018    | 15      | Cabernet Sauvignon | Mendoza, Argentina                                      |
| S9      | 2016    | 13.3    | Cabernet Sauvignon | Mendoza, Argentina                                      |
| S10     | 2016    | 14.1    | Cabernet Sauvignon | Mendoza, Argentina                                      |
| S11     | 2017    | 14.5    | Cabernet Sauvignon | Clare Valley, Australia                                 |
| S12     | 2015    | 14      | Cabernet Sauvignon | Limestone coast, Australia                              |
| S13     | 2018    | 14.5    | Cabernet Sauvignon | South Australia                                         |
| S14     | 2017    | 14      | Cabernet Sauvignon | South Australia                                         |
| S15     | 2017    | 14      | Cabernet Sauvignon | Clare Valley, Australia                                 |
| S16     | 2018    | 12      | Cabernet Sauvignon | Changyu Vineyard, China                                 |
| S17     | 2018    | 14      | Cabernet Sauvignon | Ganchengzi District, Qingtongxia, Ningxia, China        |
| S18     | 2017    | 14.2    | Cabernet Sauvignon | Ningxia Helan Mountain East Foot Production Area, China |

|     |      |      |                    |                              |
|-----|------|------|--------------------|------------------------------|
| S19 | 2017 | 13   | Cabernet Sauvignon | Changyu Vineyard, China      |
| S20 | 2019 | 13   | Cabernet Sauvignon | Changyu Vineyard, China      |
| S21 | 2018 | 14   | Shiraz             | Limestone Coast of Australia |
| S22 | 2016 | 14   | Shiraz             | Great West, Australia        |
| S23 | 2016 | 14.5 | Shiraz             | Hunter Valley, Australia     |
| S24 | 2016 | 14   | Shiraz             | South Australia              |
| S25 | 2016 | 14.5 | Shiraz             | Barossa, Australia           |
| S26 | 2016 | 14.5 | Shiraz             | Pertway, Australia           |
| S27 | 2016 | 14.5 | Shiraz             | Kunawala, Australia          |
| S28 | 2014 | 14   | Shiraz             | Moray Valley, Chile          |
| S29 | 2016 | 14   | Shiraz             | Espinal vineyard, Chile      |
| S30 | 2018 | 14.3 | Shiraz             | Pascual Toso, Argentina      |
| S31 | 2018 | 13.5 | Merlot             | Cachabel Valley, Chile       |
| S32 | 2018 | 13.5 | Merlot             | Curisco Valley, Chile        |
| S33 | 2017 | 14.5 | Merlot             | Konggagua Valley, Chile      |
| S34 | 2019 | 13.5 | Merlot             | Southeast Australia          |
| S35 | 2014 | 12.5 | Merlot             | Southeast Australia          |

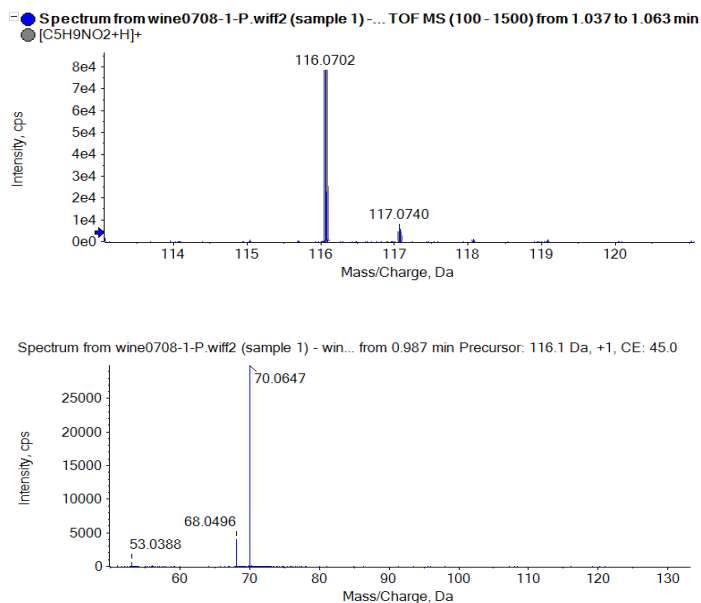

**Figure S1.** The MS and MS/MS fragments of D-proline.

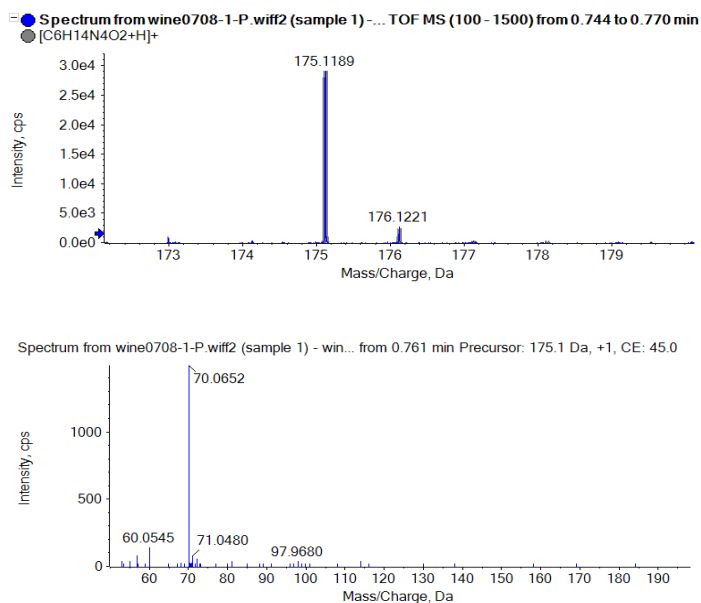

**Figure S2.** The MS and MS/MS fragments of L-arginine.

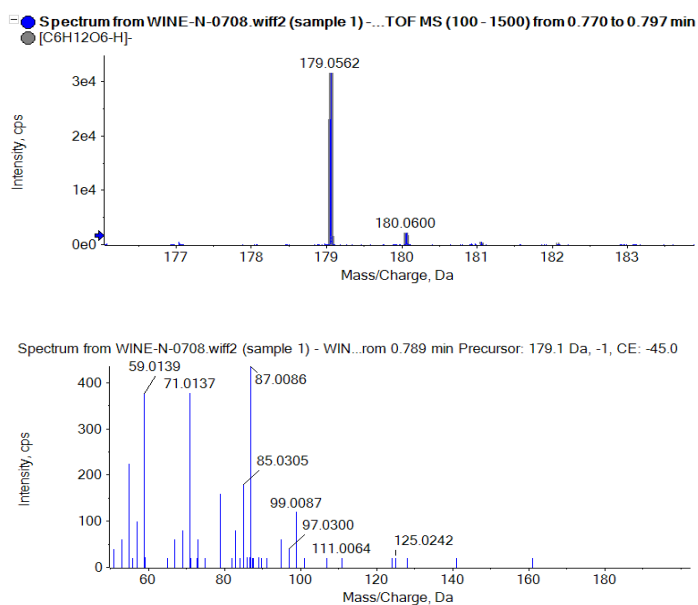

**Figure S3.** The MS and MS/MS fragments of D-glucose.

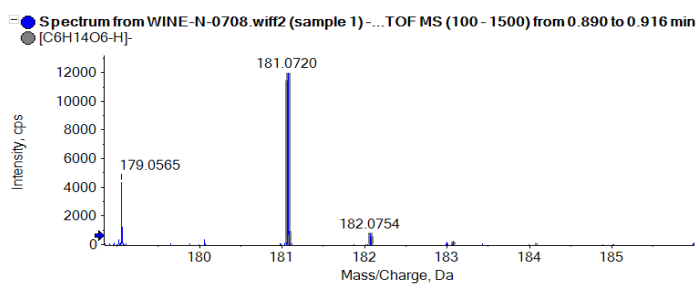

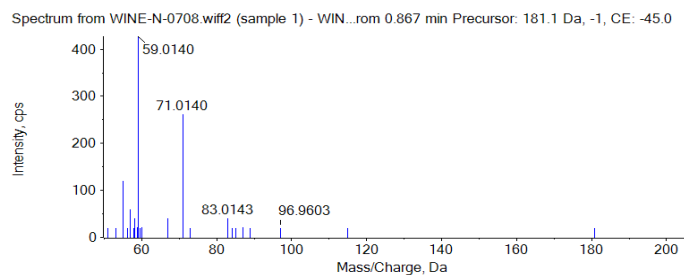

**Figure S4.** The MS and MS/MS fragments of D-mannitol.

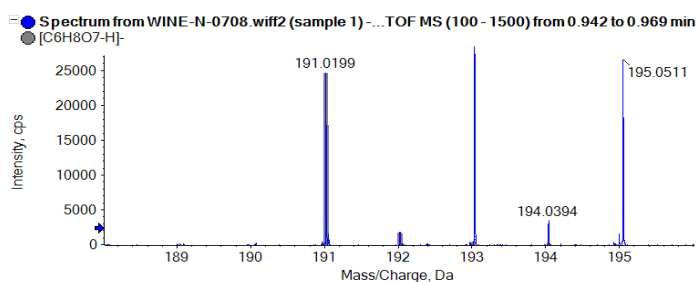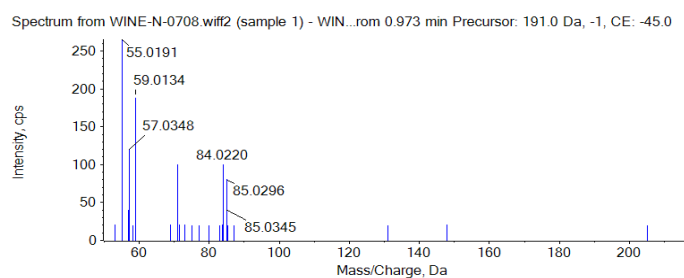

**Figure S5.** The MS and MS/MS fragments of citric acid.

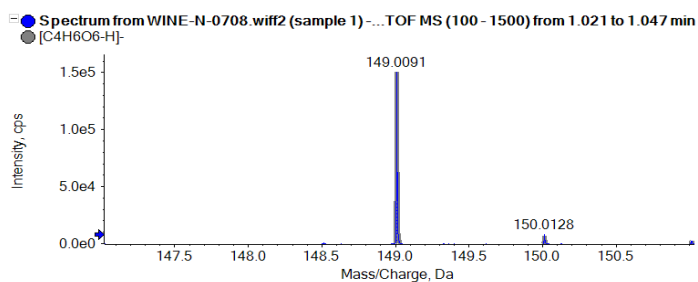

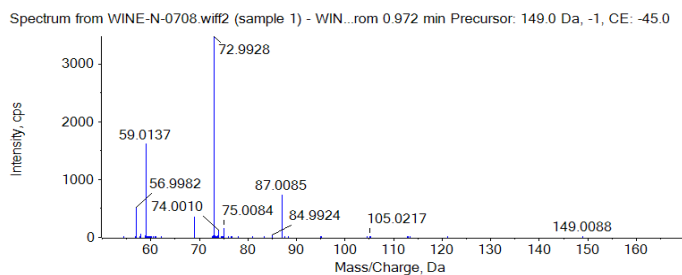

**Figure S6.** The MS and MS/MS fragments of tartaric acid.

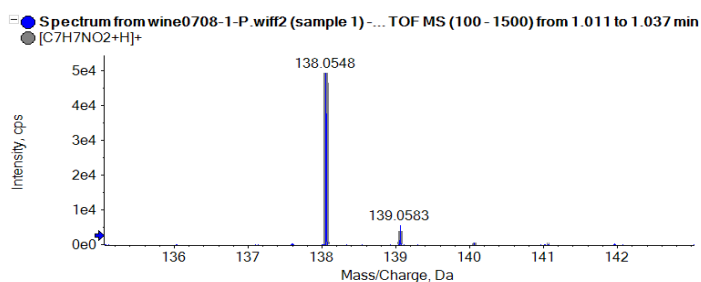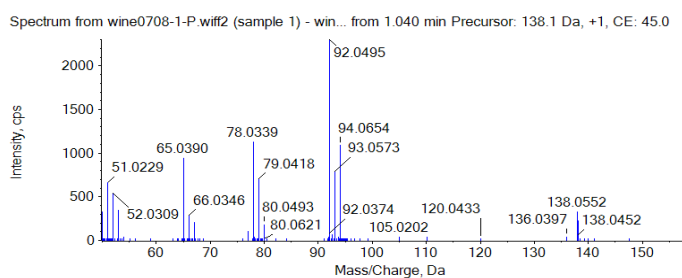

**Figure S7.** The MS and MS/MS fragments of 4-aminobenzoic acid.

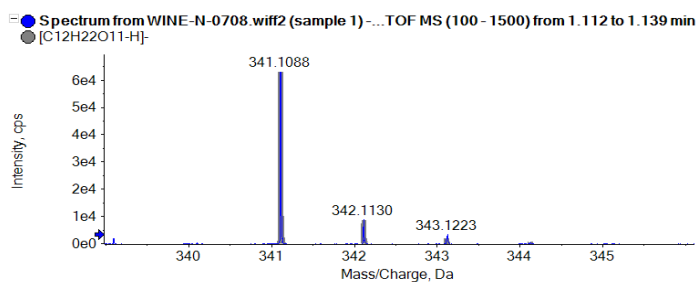

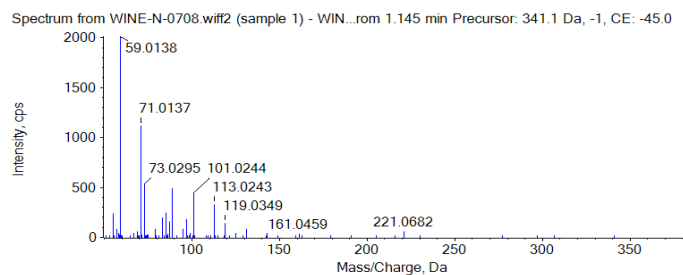

**Figure S8.** The MS and MS/MS fragments of trehalose.

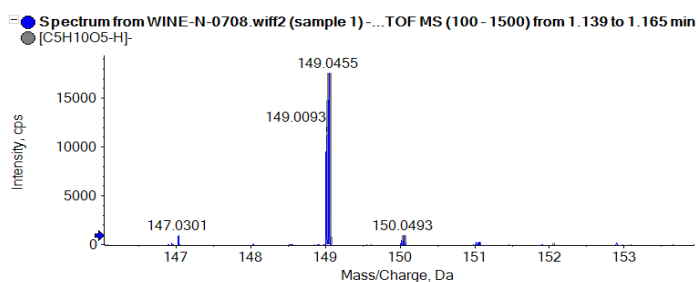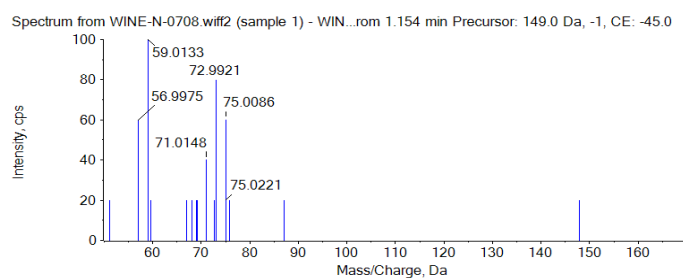

**Figure S9.** The MS and MS/MS fragments of D-ribose.

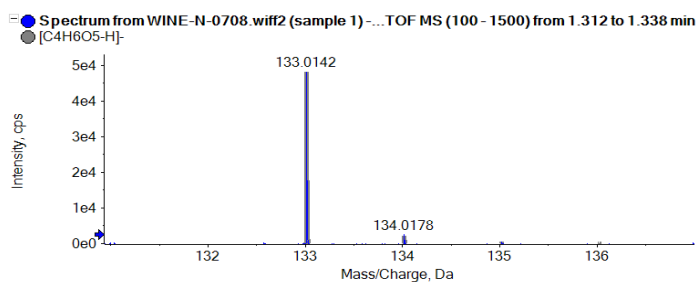

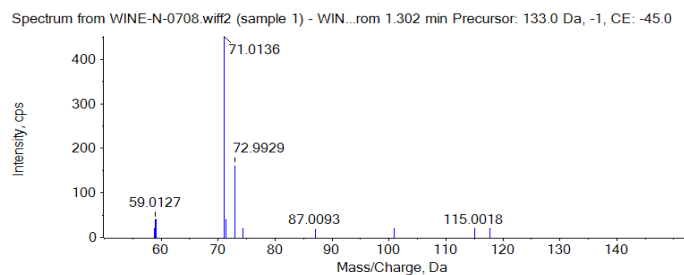

**Figure S10.** The MS and MS/MS fragments of L-malic acid.

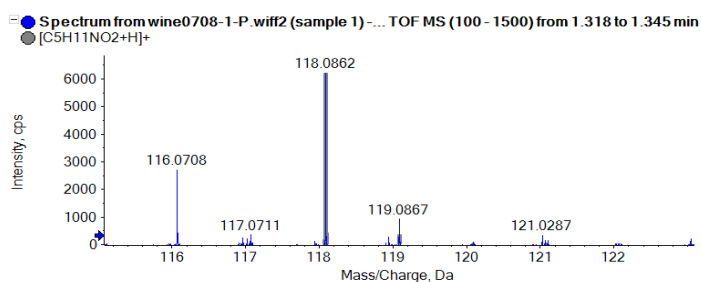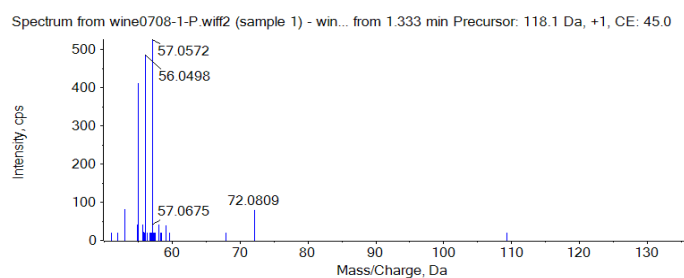

**Figure S11.** The MS and MS/MS fragments of L-valine.

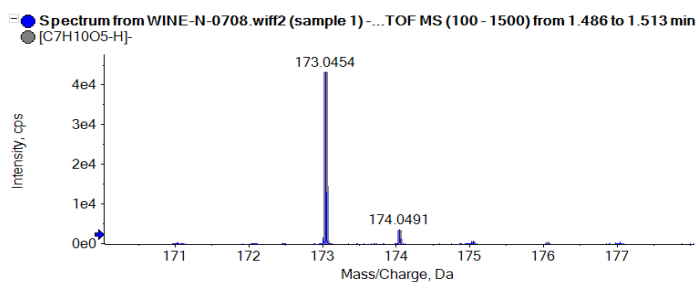

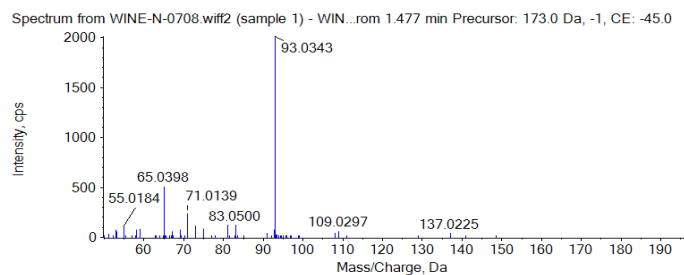

**Figure S12.** The MS and MS/MS fragments of shikimic acid.

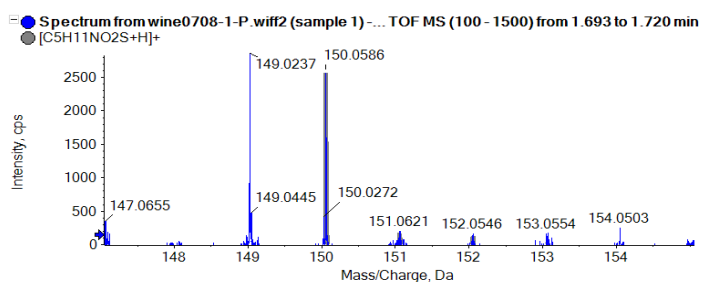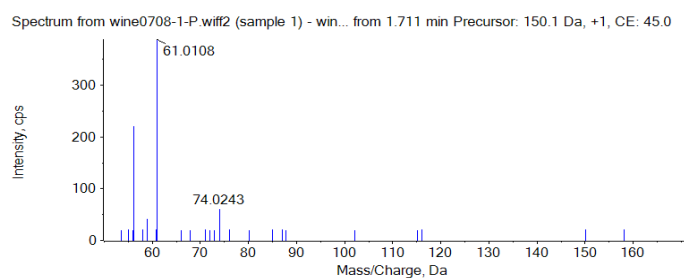

**Figure S13.** The MS and MS/MS fragments of L-methionine.

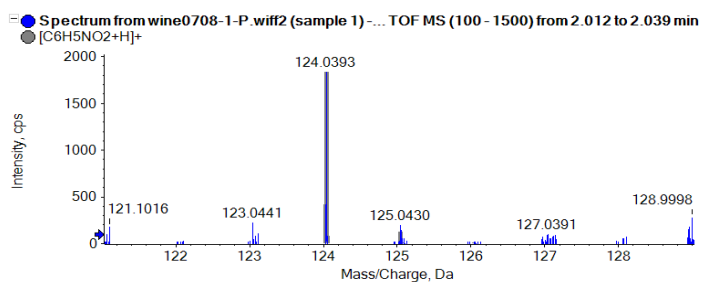



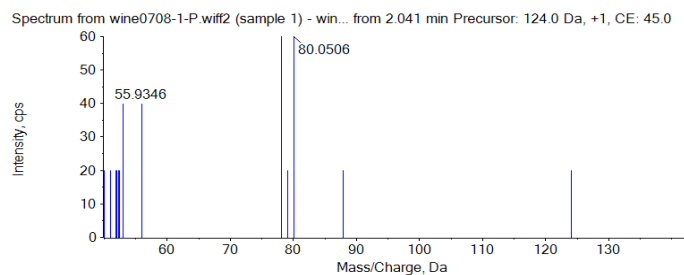

**Figure S14.** The MS and MS/MS fragments of niacin.

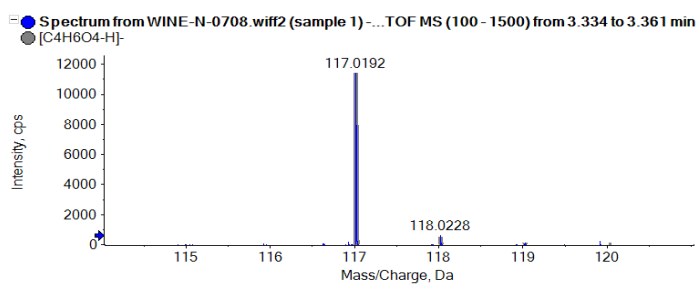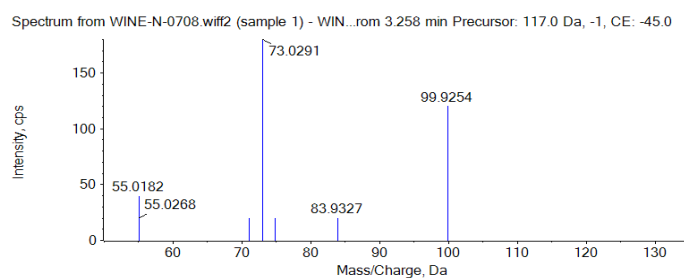

**Figure S15.** The MS and MS/MS fragments of succinic acid.

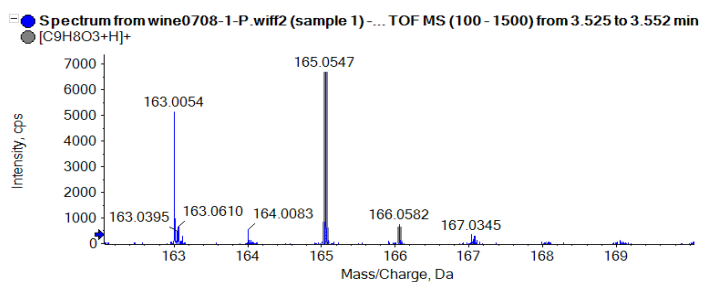

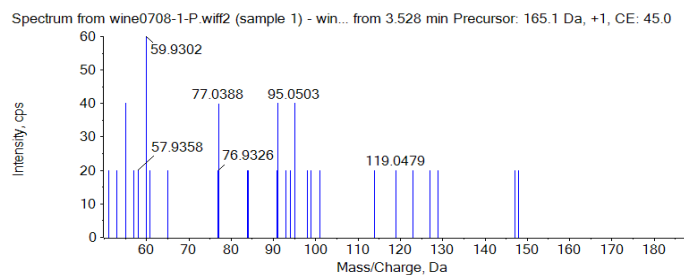

**Figure S16.** The MS and MS/MS fragments of trans-4-hydroxycinnamic acid.

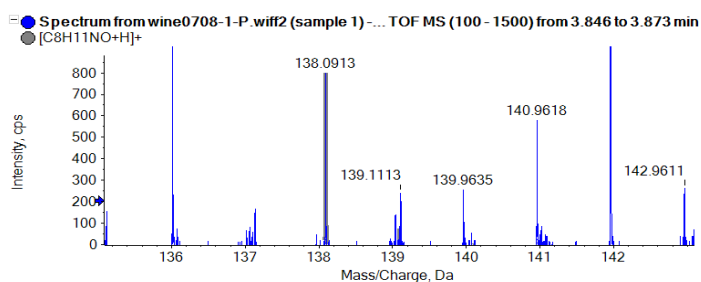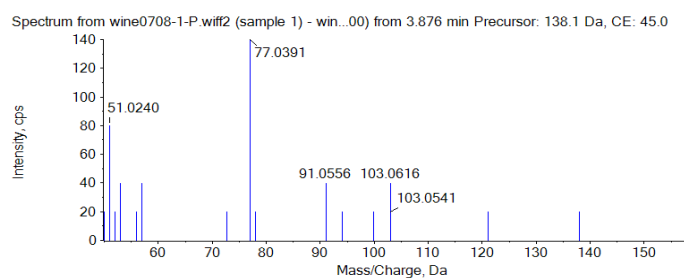

**Figure S17.** The MS and MS/MS fragments of tyramine.

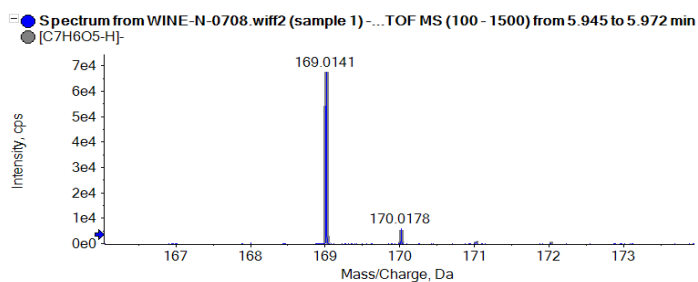

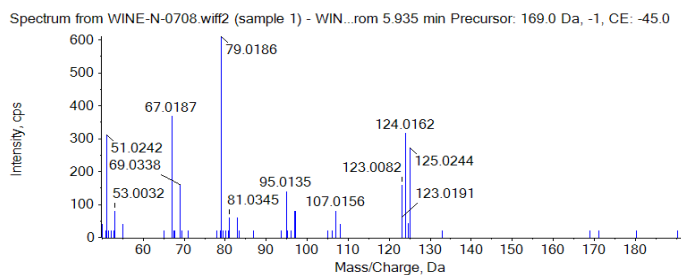

**Figure S18.** The MS and MS/MS fragments of gallic acid.

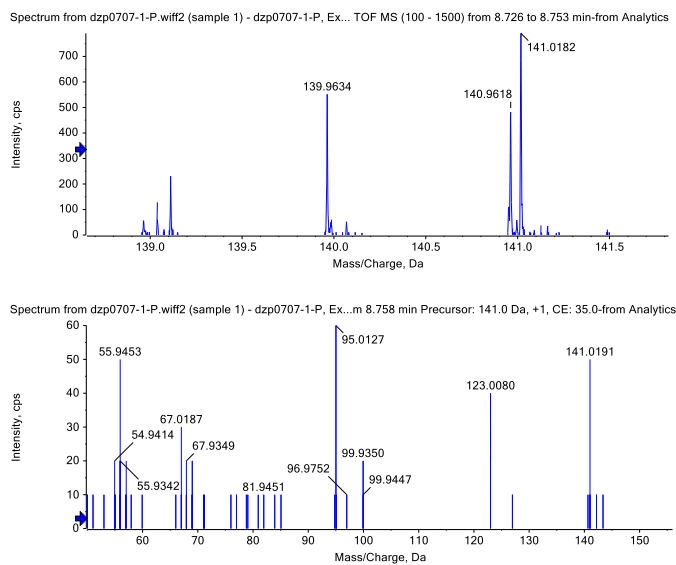

**Figure S19.** The MS and MS/MS fragments of coumalic acid.

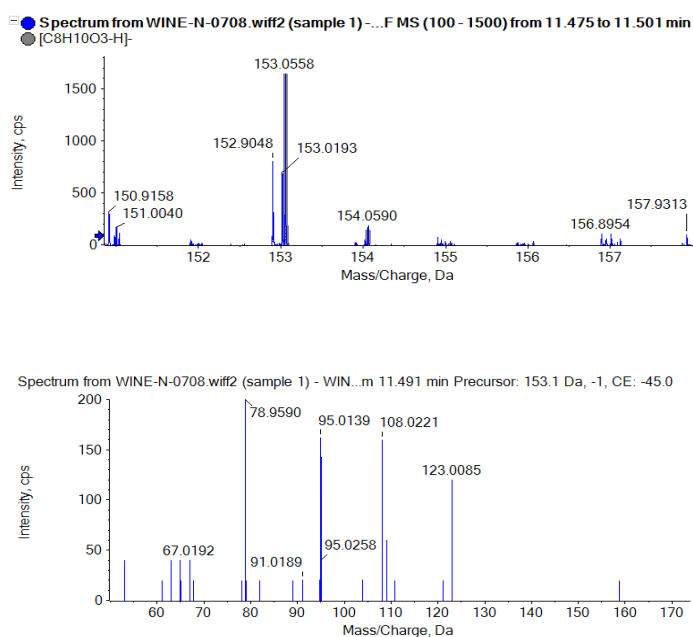

**Figure S20.** The MS and MS/MS fragments of hydroxytyrosol.

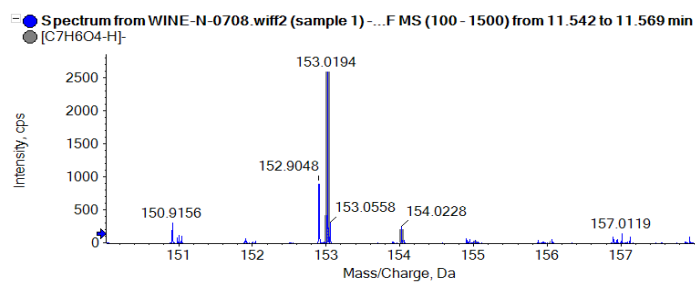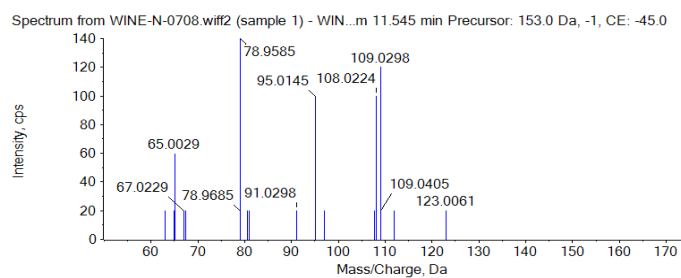

**Figure S21.** The MS and MS/MS fragments of protocatechuic acid.

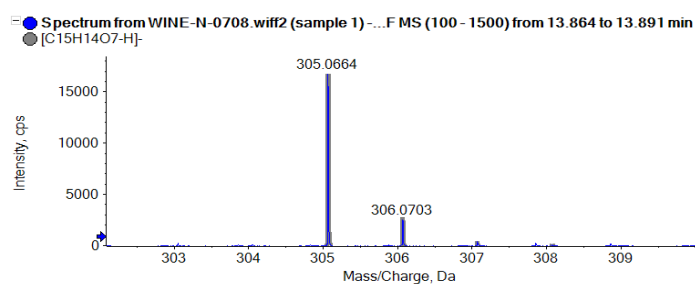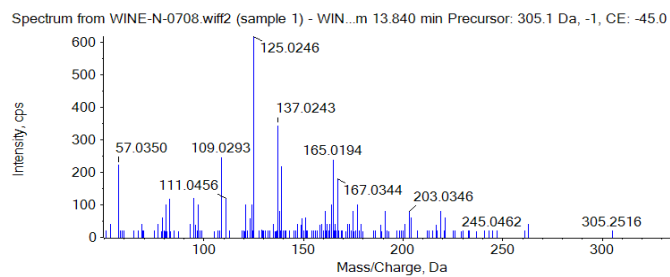

**Figure S22.** The MS and MS/MS fragments of (+)-gallocatechin.

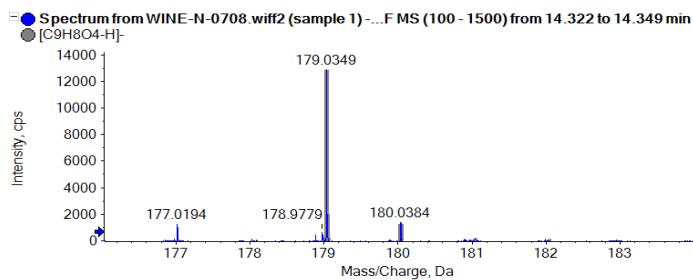

Spectrum from WINE-N-0708.wiff2 (sample 1) - WIN...m 14.244 min Precursor: 179.0 Da, -1, CE: -45.0

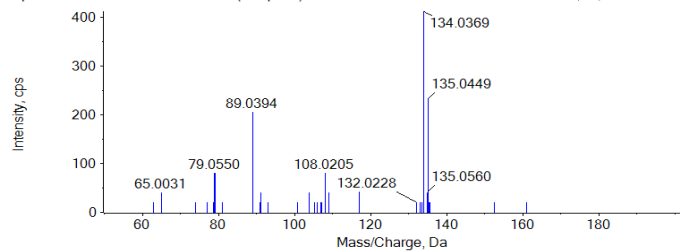

**Figure S23.** The MS and MS/MS fragments of **acetylsalicylic acid**.

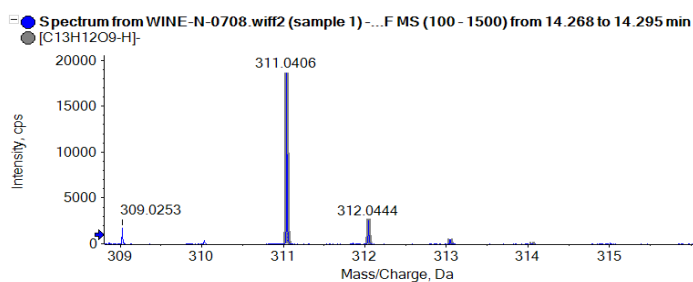

Spectrum from WINE-N-0708.wiff2 (sample 1) - WIN...m 14.258 min Precursor: 311.0 Da, -1, CE: -45.0

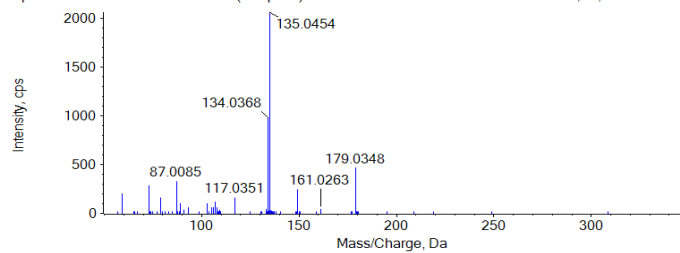

**Figure S24.** The MS and MS/MS fragments of caftaric acid.

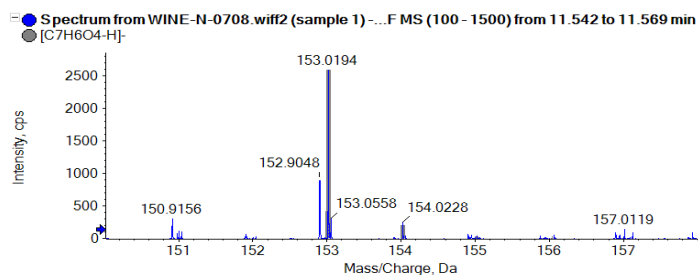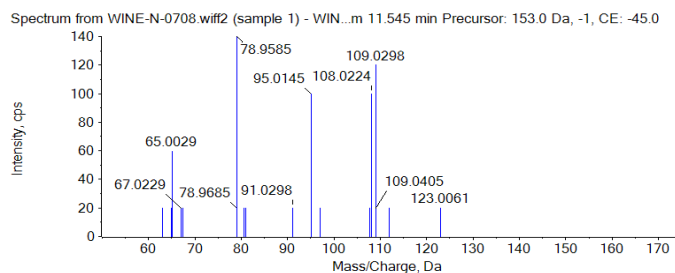

**Figure S25.** The MS and MS/MS fragments of gentisic acid.

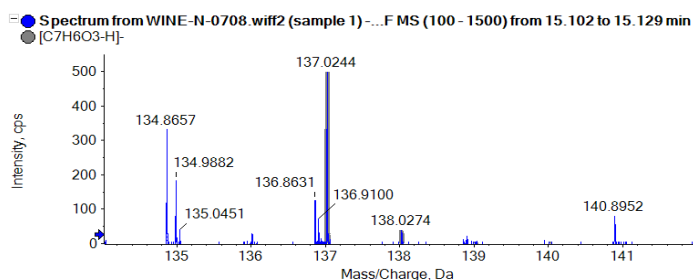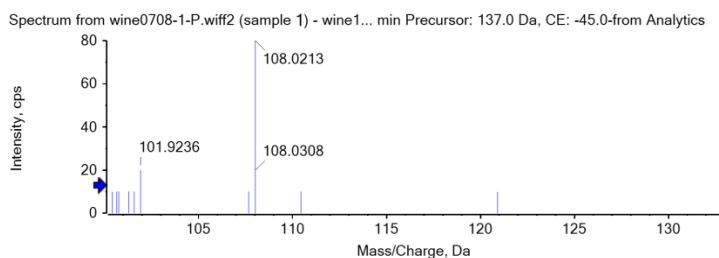

**Figure S26.** The MS and MS/MS fragments of protocatechualdehyde.

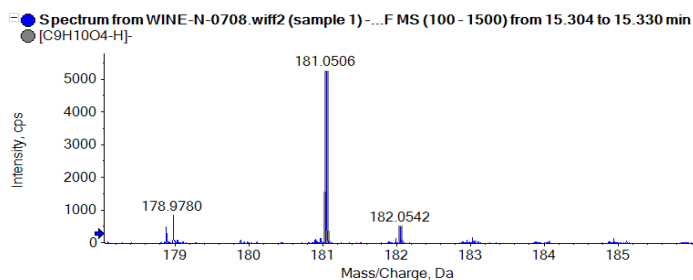

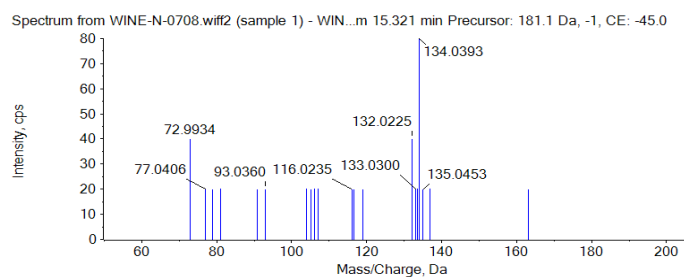

**Figure S27.** The MS and MS/MS fragments of homovanillic acid.

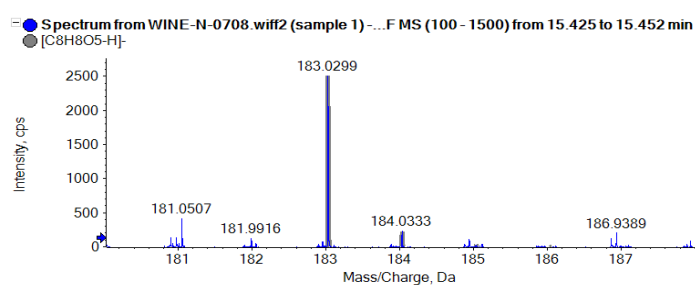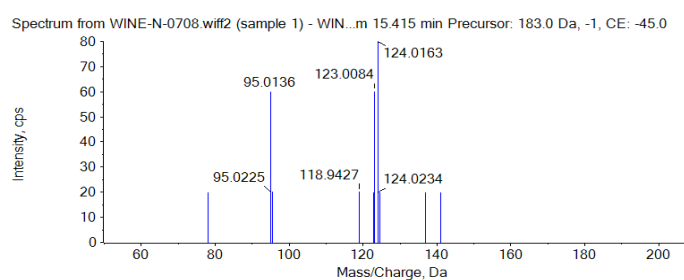

**Figure S28.** The MS and MS/MS fragments of methyl gallate.

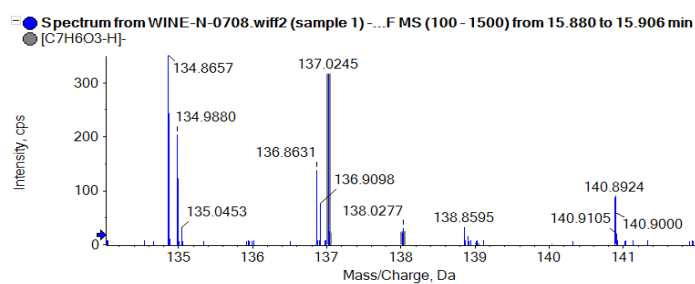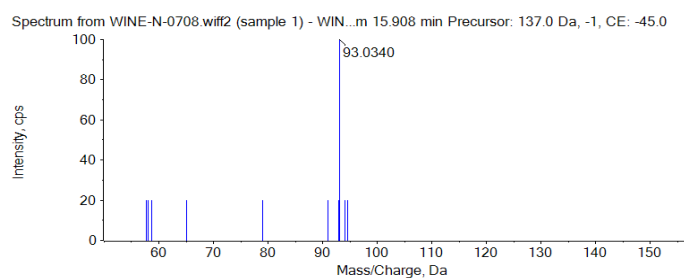

**Figure S29.** The MS and MS/MS fragments of 4-hydroxybenzoic acid.

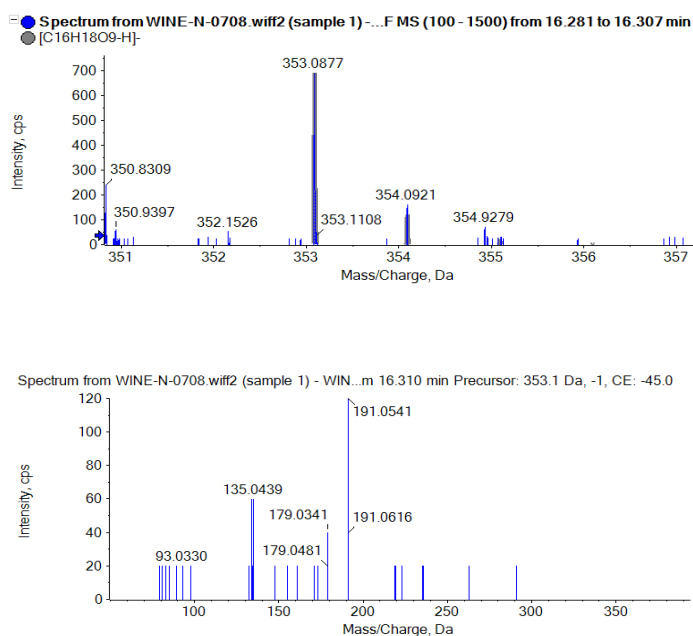

**Figure S30.** The MS and MS/MS fragments of chlorogenic acid.

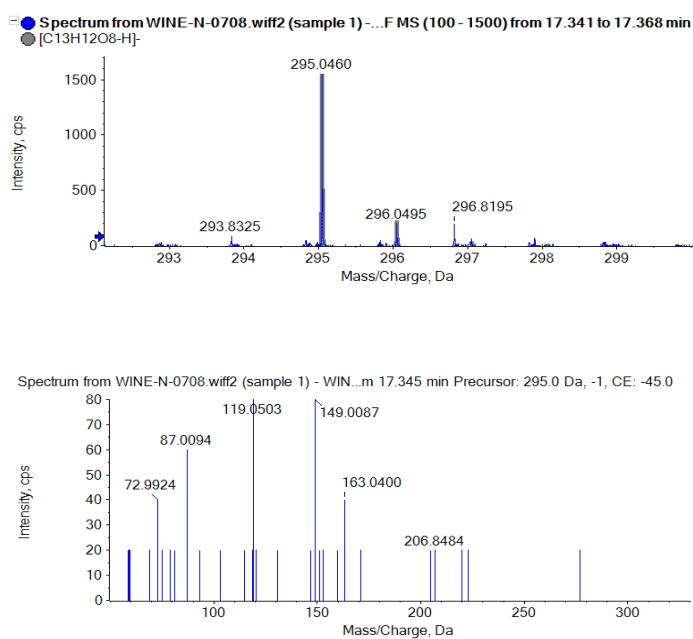

**Figure S31.** The MS and MS/MS fragments of p-coutaric acid.



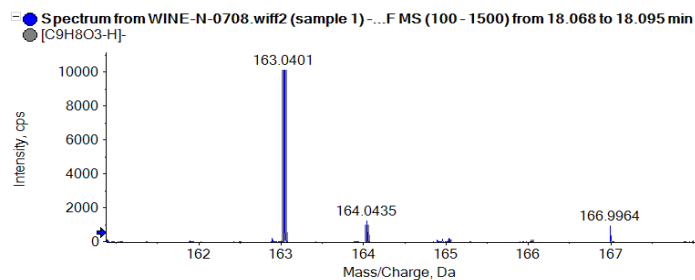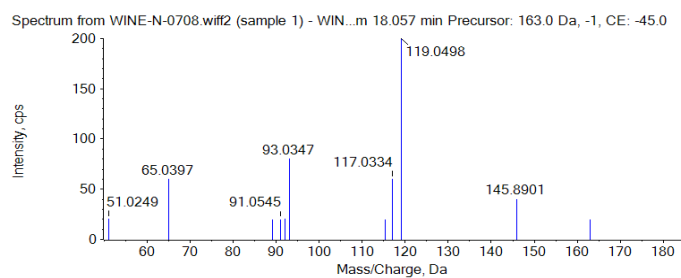

**Figure S32.** The MS and MS/MS fragments of m-coumaric acid.

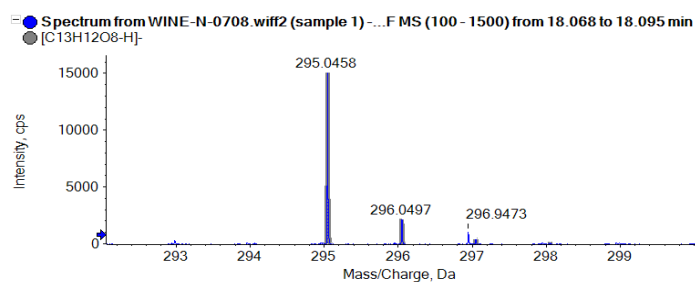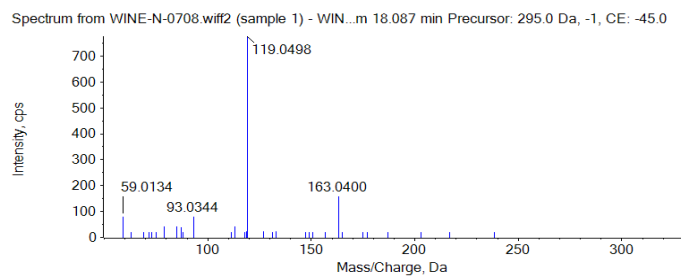

**Figure S33.** The MS and MS/MS fragments of coutaric acid.

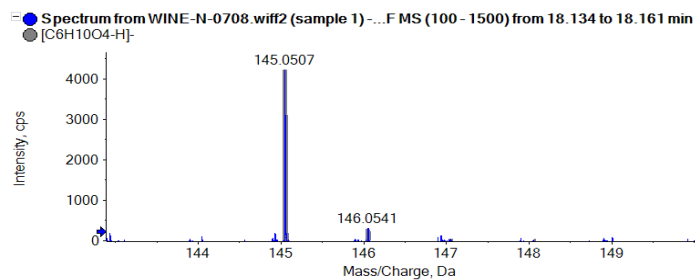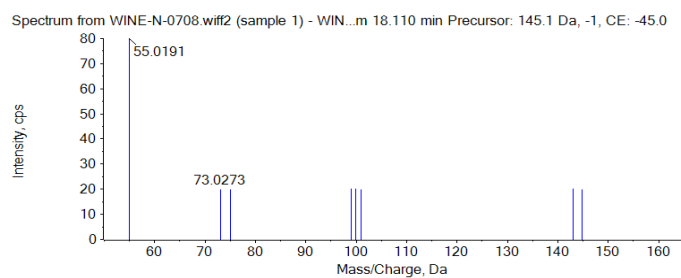

**Figure S34.** The MS and MS/MS fragments of dimethyl succinate.

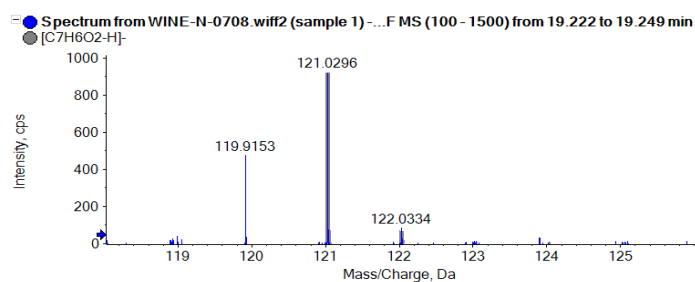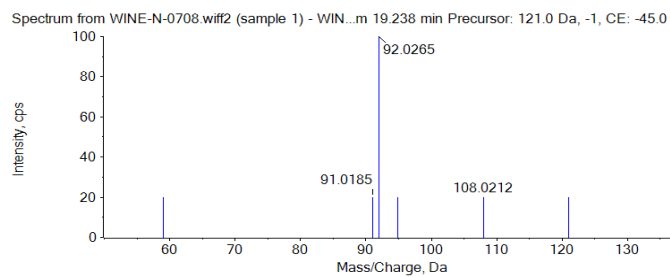

**Figure S35.** The MS and MS/MS fragments of benzoic acid.

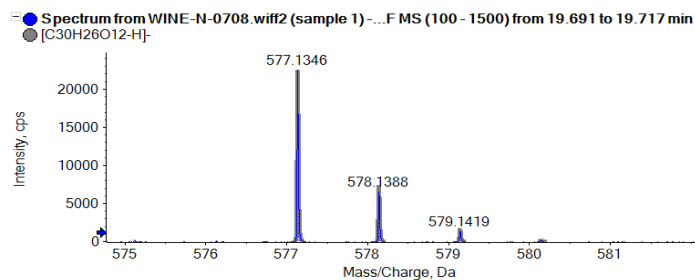

Spectrum from WINE-N-0708.wiff2 (sample 1) - WIN...m 19.670 min Precursor: 577.1 Da, -1, CE: -45.0

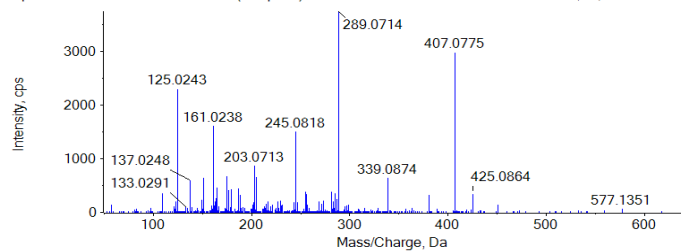

**Figure S36.** The MS and MS/MS fragments of procyanidin B1.

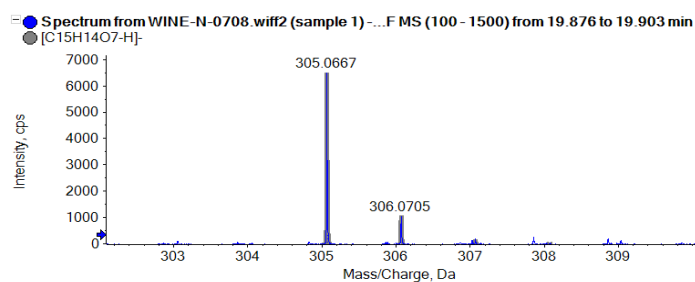

Spectrum from WINE-N-0708.wiff2 (sample 1) - WIN...m 19.880 min Precursor: 305.1 Da, -1, CE: -45.0

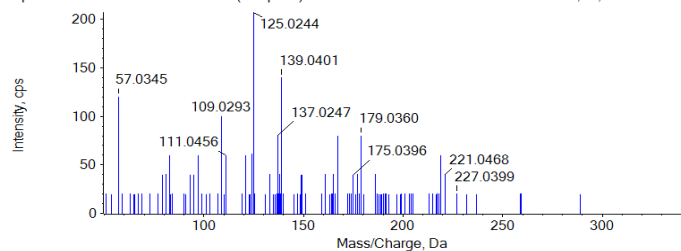

**Figure S37.** The MS and MS/MS fragments of (-)-epigallocatechin.

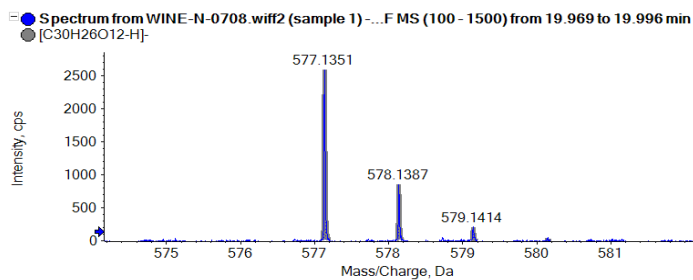

Spectrum from WINE-N-0708.wiff2 (sample 1) - WIN...m 19.979 min Precursor: 577.1 Da, -1, CE: -45.0

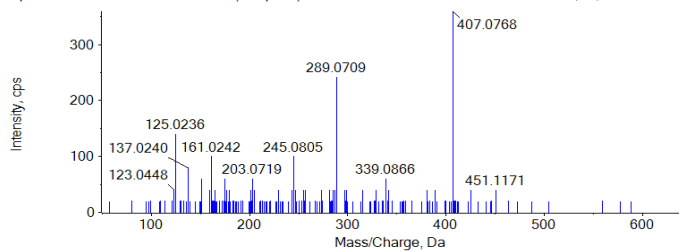

**Figure S38.** The MS and MS/MS fragments of procyanidin B3.

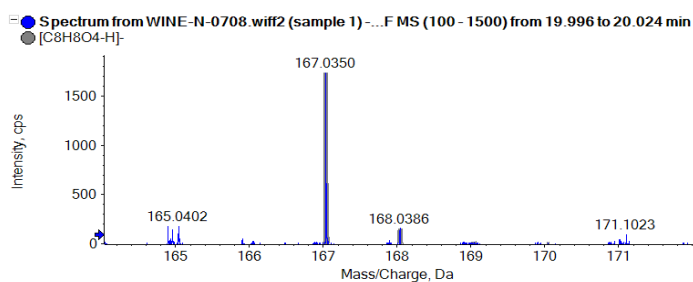

Spectrum from WINE-N-0708.wiff2 (sample 1) - WIN...m 19.986 min Precursor: 167.0 Da, -1, CE: -45.0

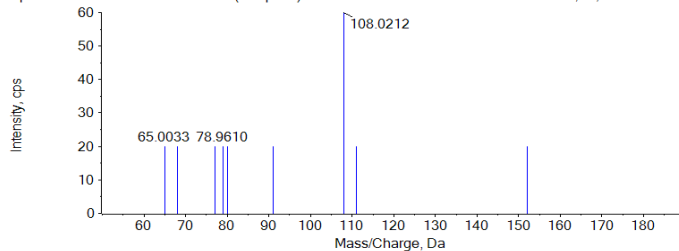

**Figure S39.** The MS and MS/MS fragments of vanillic acid.

Spectrum from wine60min-POS.wiff2 (sample 3) - ...1500) from 20.204 to 20.216 min-from Analytics

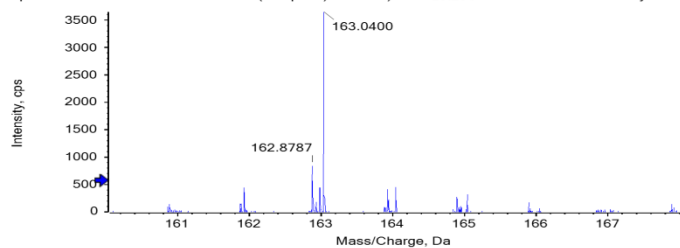

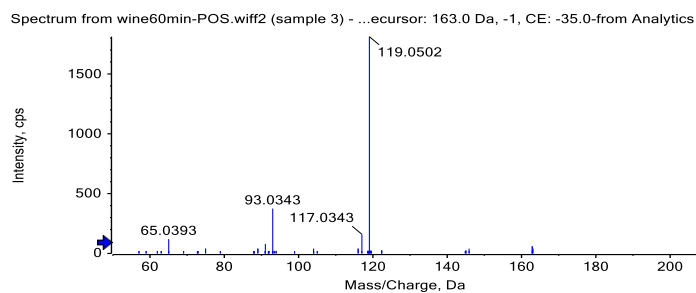

**Figure S40.** The MS and MS/MS fragments of 2-Hydroxycinnamic acid.

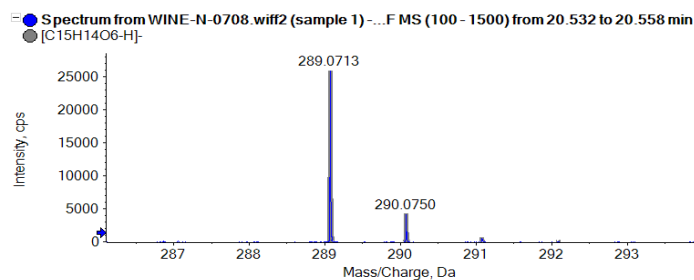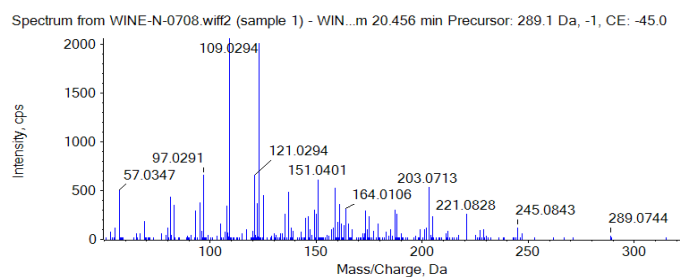

**Figure S41.** The MS and MS/MS fragments of catechin.

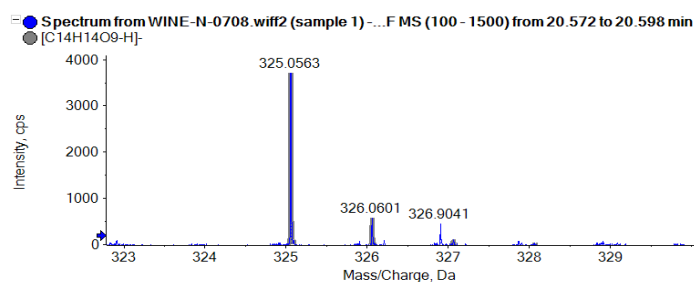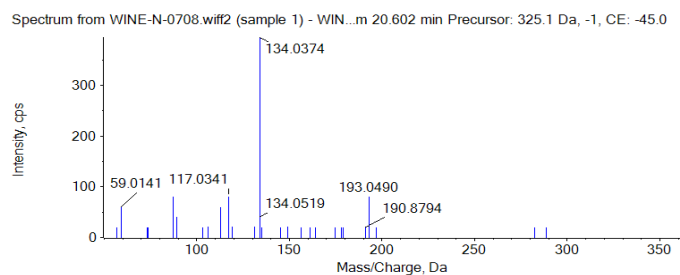

**Figure S42.** The MS and MS/MS fragments of fertaric acid.

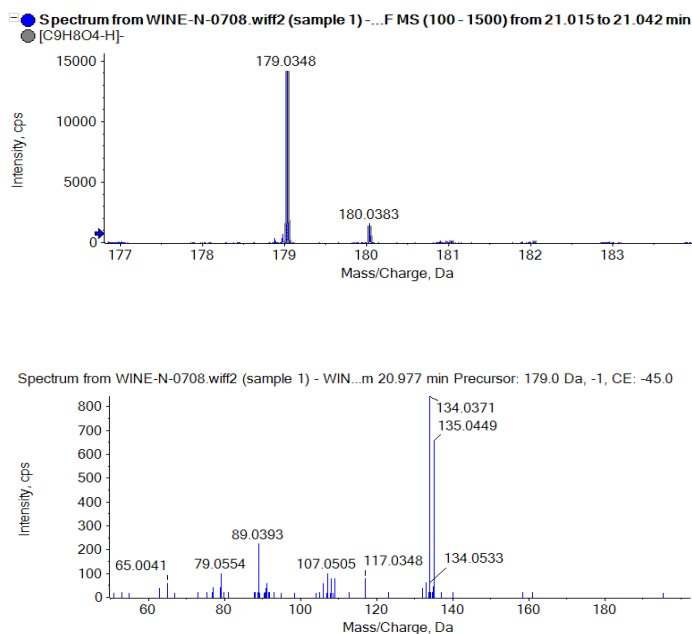

**Figure S43.** The MS and MS/MS fragments of caffeic acid.

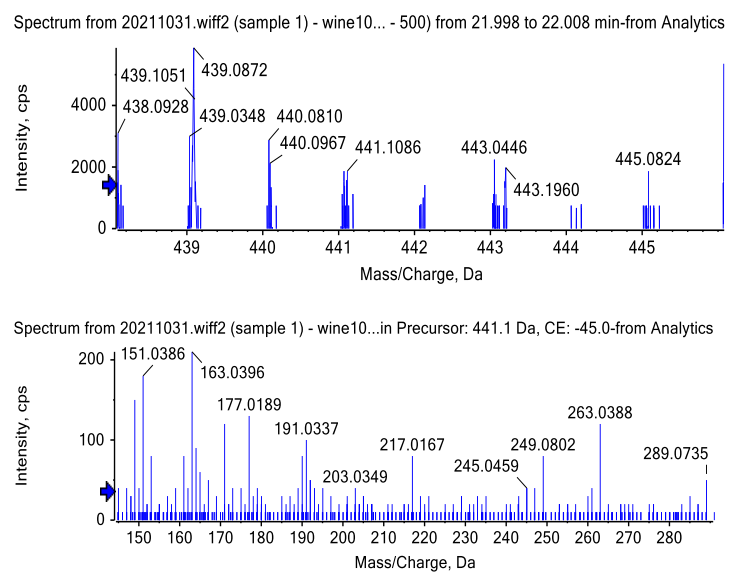

**Figure S44.** The MS and MS/MS fragments of epicatechin gallate.

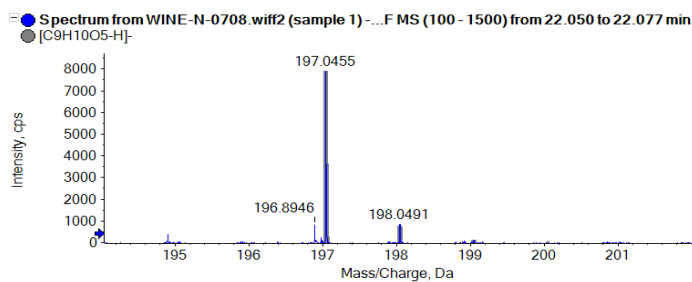

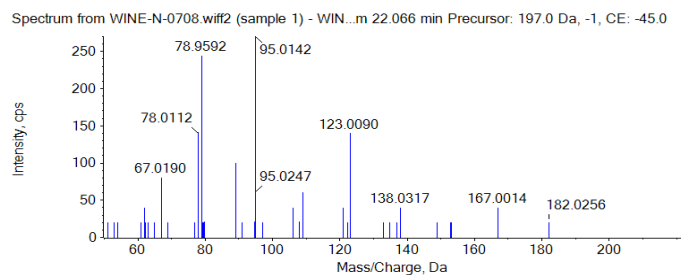

**Figure S45.** The MS and MS/MS fragments of syringic acid.

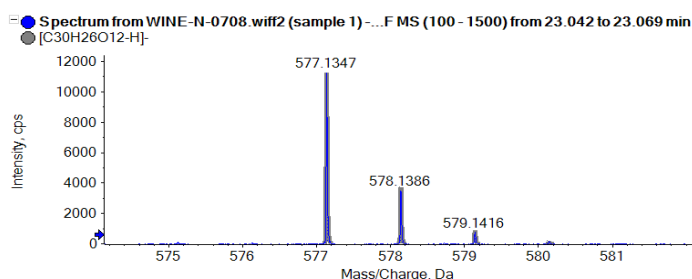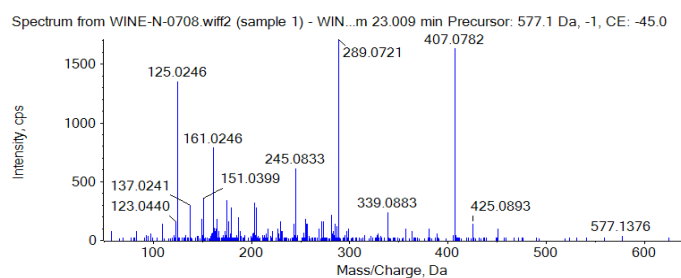

**Figure S46.** The MS and MS/MS fragments of procyanidin B2.

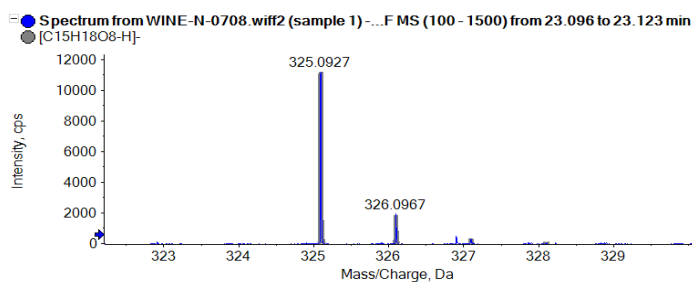

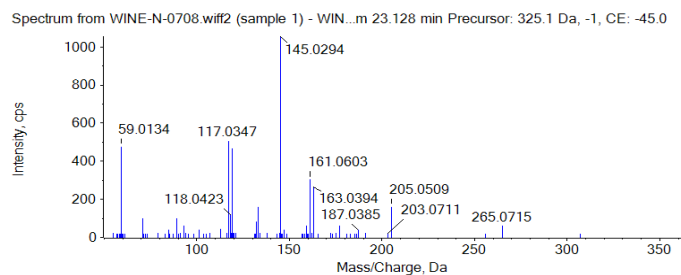

**Figure S47.** The MS and MS/MS fragments of p-coumaric acid glucoside.

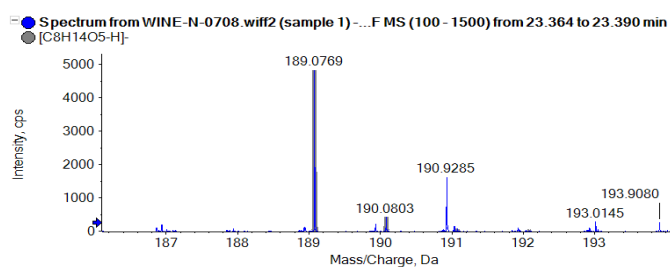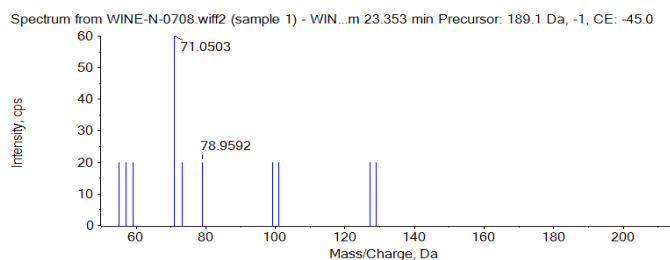

**Figure S48.** The MS and MS/MS fragments of diethyl malate.

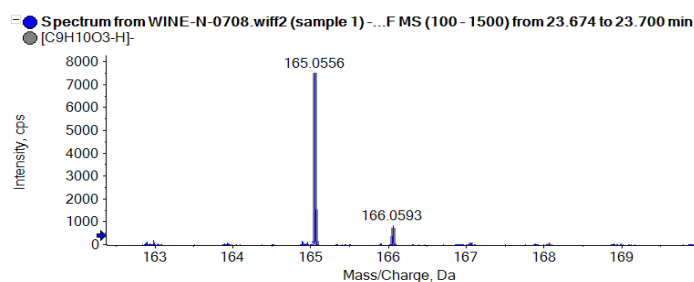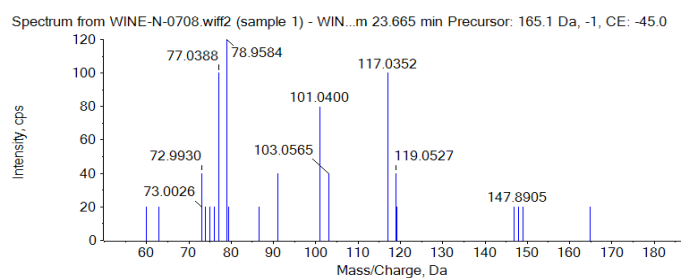



**Figure S49.** The MS and MS/MS fragments of desaminotyrosine.

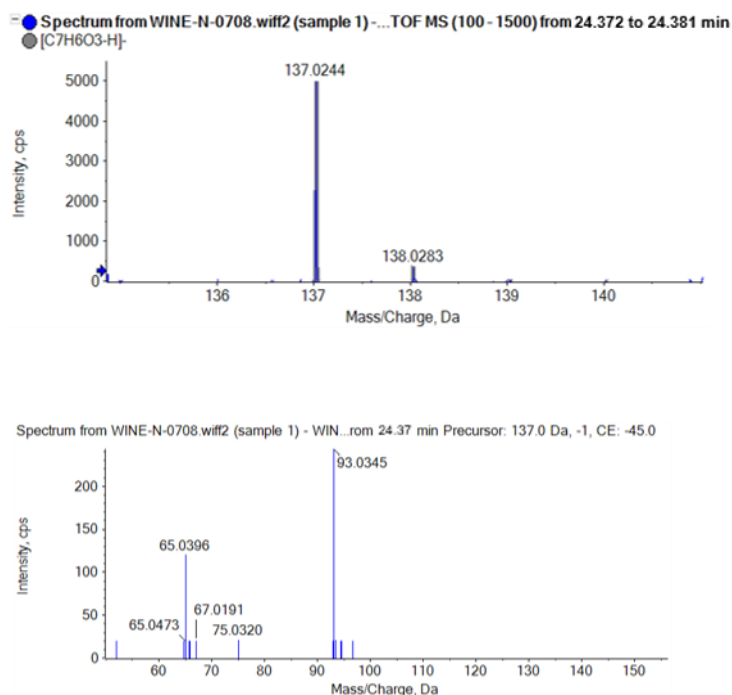

**Figure S50.** The MS and MS/MS fragments of 2-hydroxybenzoic acid.

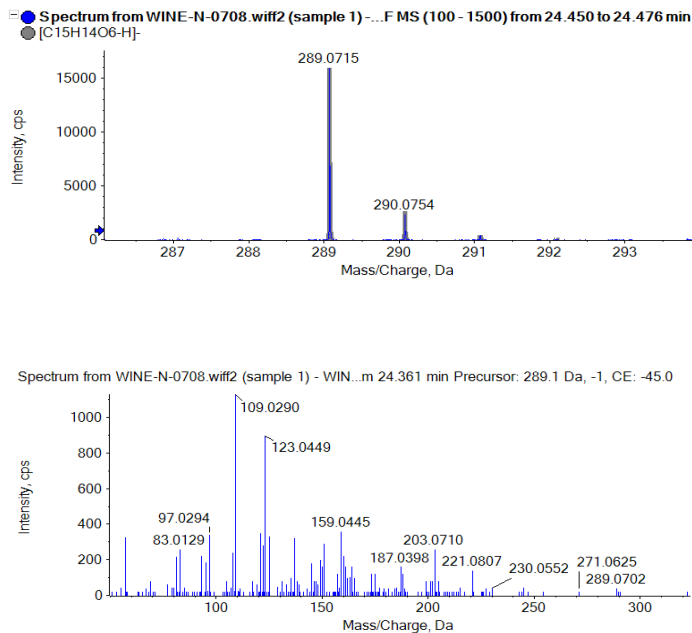

**Figure S51.** The MS and MS/MS fragments of epicatechin.

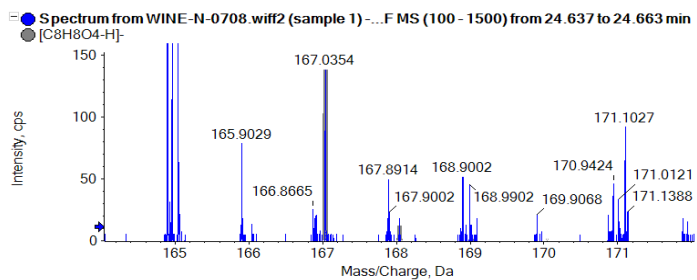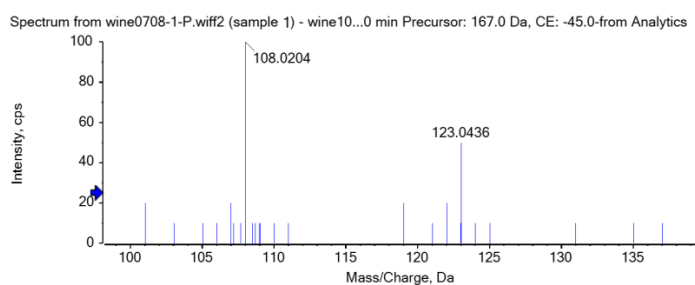

**Figure S52.** The MS and MS/MS fragments of 3-hydroxy-4-methoxybenzoic acid.

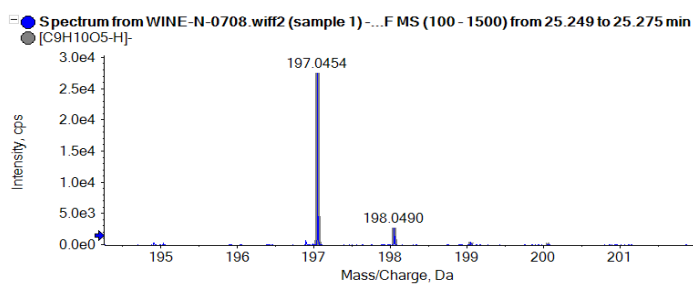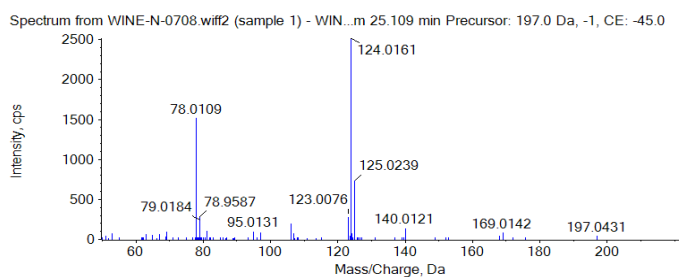

**Figure S53.** The MS and MS/MS fragments of ethyl gallate.

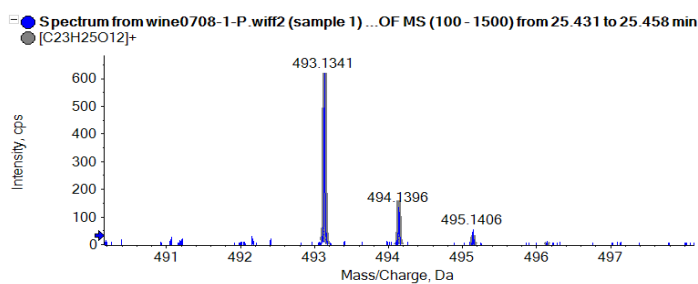

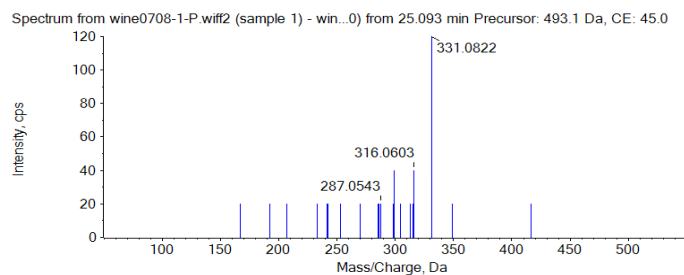

**Figure S54.** The MS and MS/MS fragments of malvidin-3-O-glucoside.

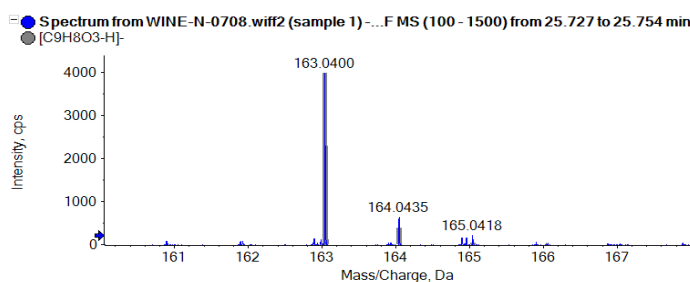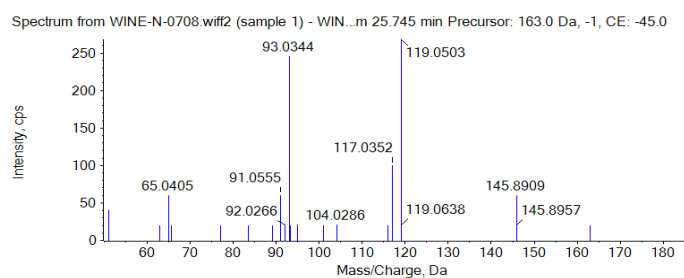

**Figure S55.** The MS and MS/MS fragments of p-coumaric acid.

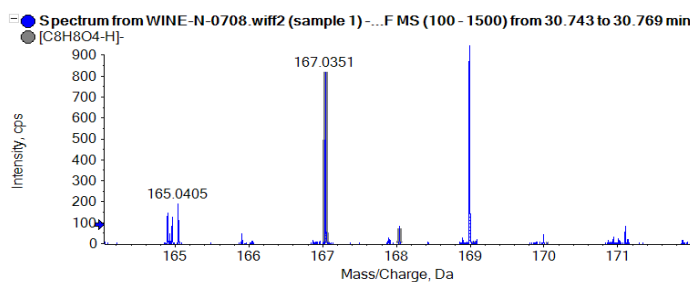

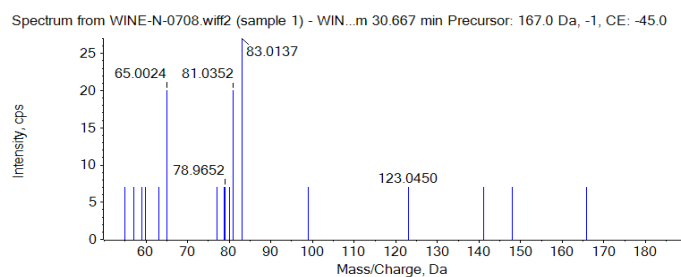

**Figure S56.** The MS and MS/MS fragments of homogentisic acid.

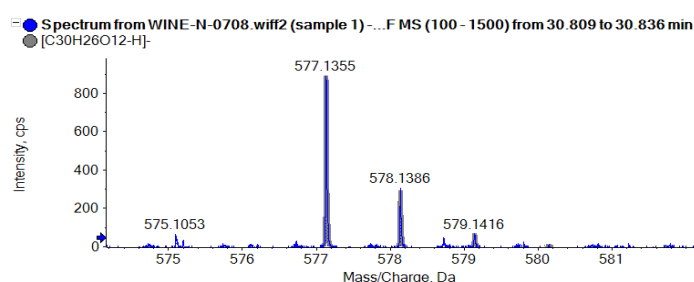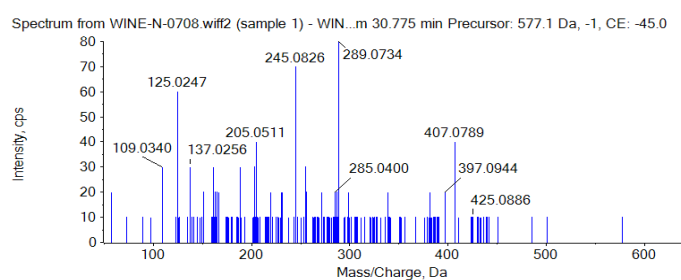

**Figure S57.** The MS and MS/MS fragments of procyanidin B7.

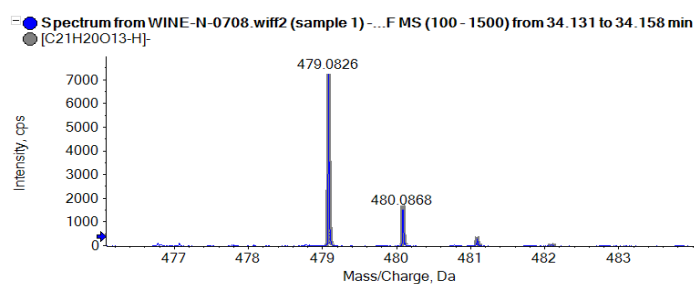

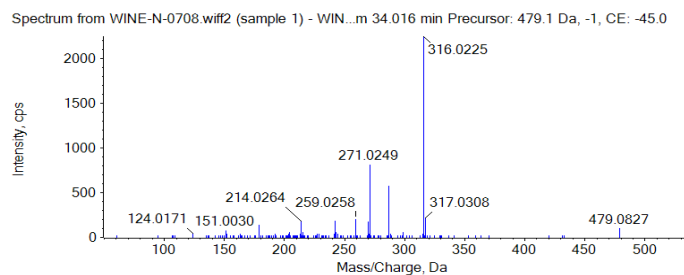

**Figure S58.** The MS and MS/MS fragments of myricetin-3-O-galactoside.

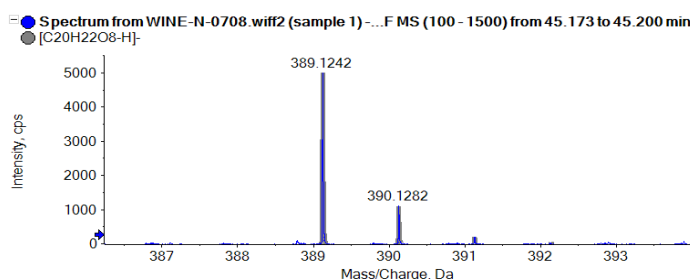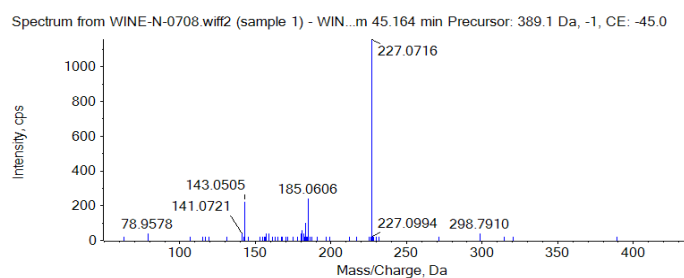

**Figure S59.** The MS and MS/MS fragments of trans-piceid.

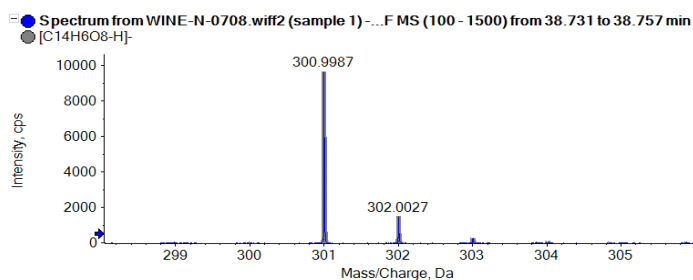

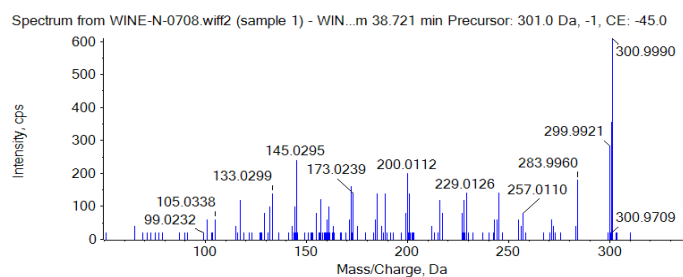

**Figure S60.** The MS and MS/MS fragments of ellagic acid.

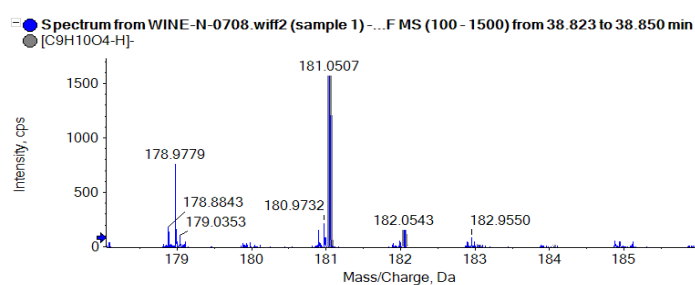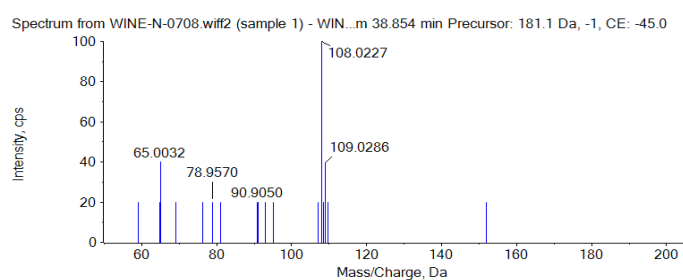

**Figure S61.** The MS and MS/MS fragments of dihydrocaffeic acid.

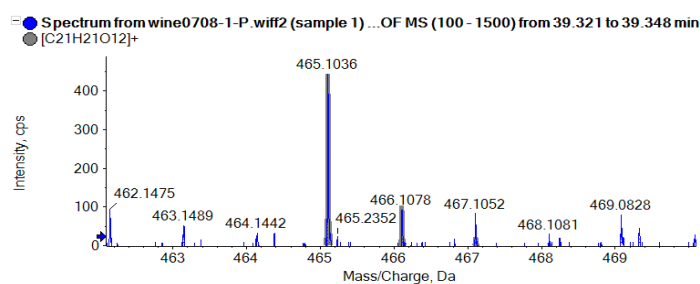

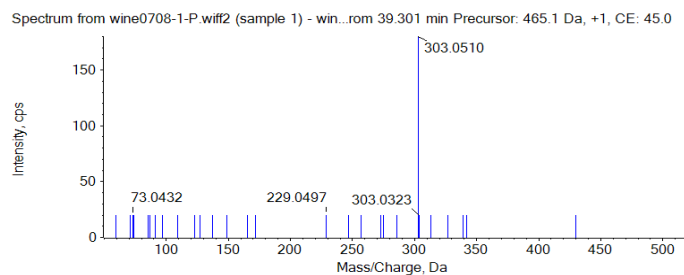

**Figure S62.** The MS and MS/MS fragments of delphinidin-3-O-glucoside.

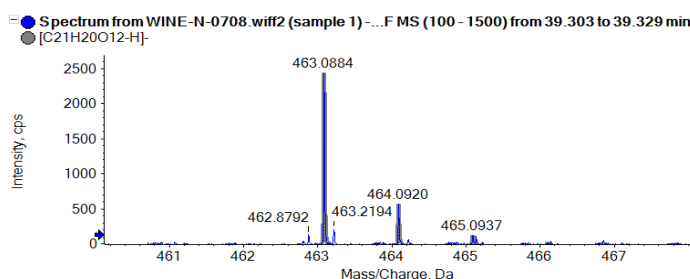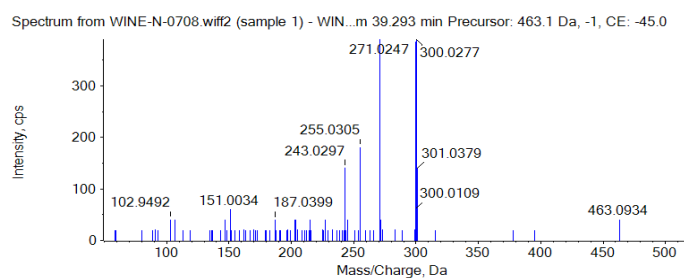

**Figure S63.** The MS and MS/MS fragments of hyperoside.

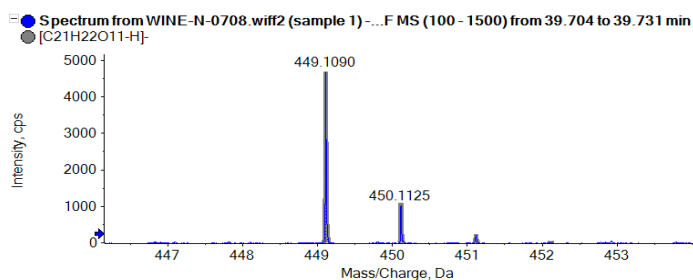

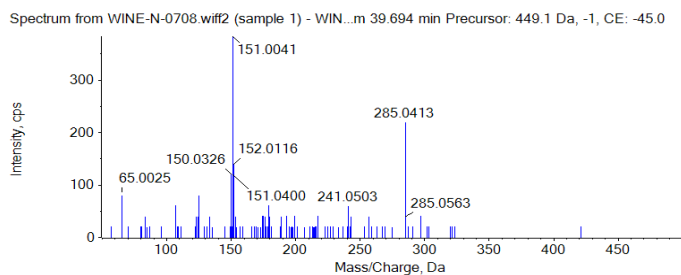

**Figure S64.** The MS and MS/MS fragments of quercitrin.

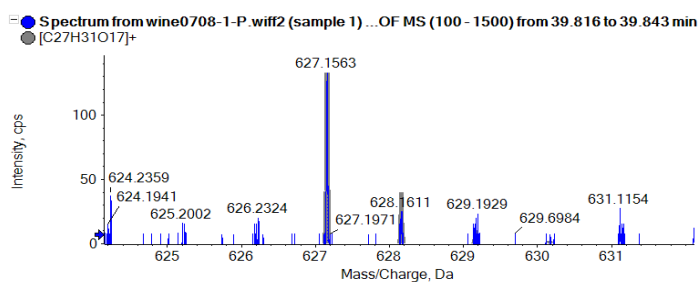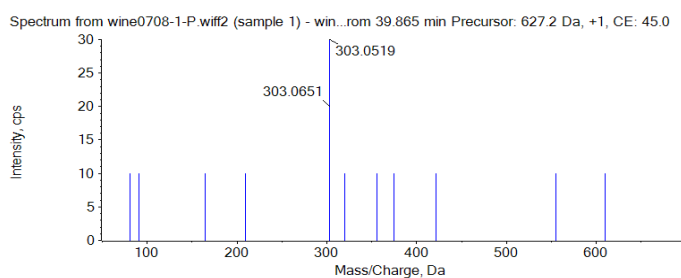

**Figure S65.** The MS and MS/MS fragments of delphinidin-3,5-O-diglucoside.

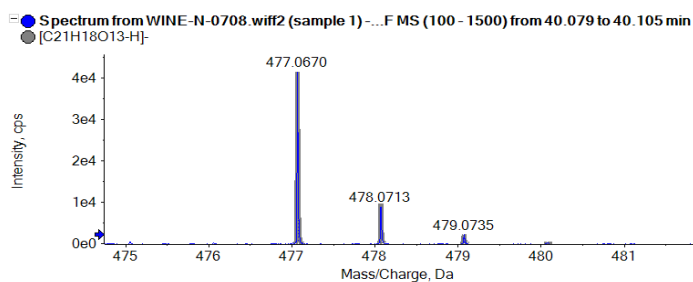



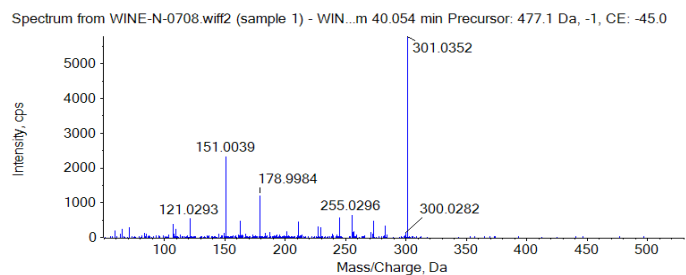

**Figure S66.** The MS and MS/MS fragments of quercetin-3-O-glucuronide.

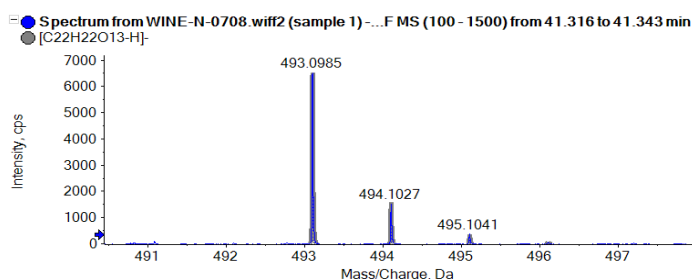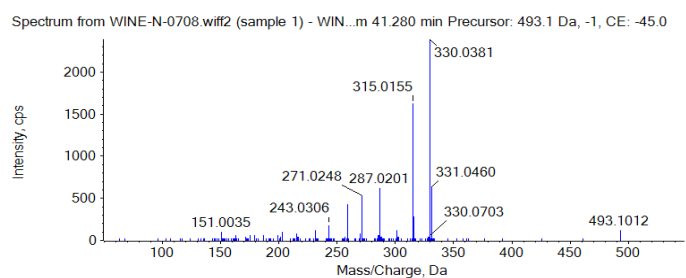

**Figure S67.** The MS and MS/MS fragments of laricitrin-3-O-glucoside.

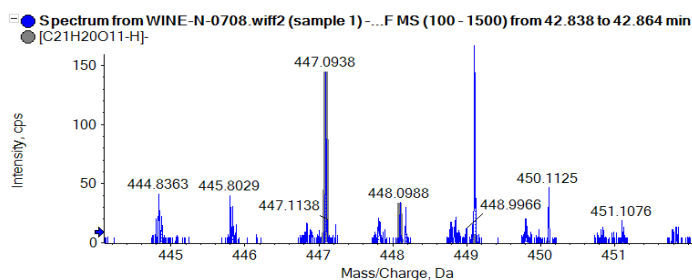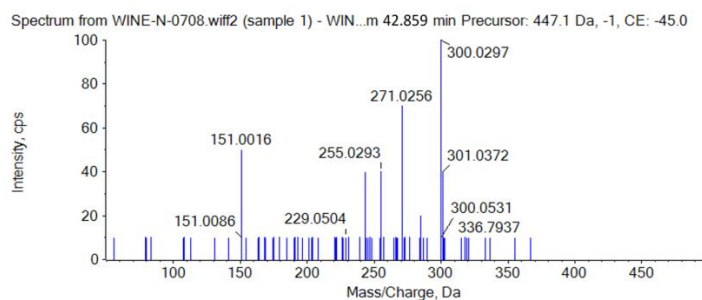

**Figure S68.** The MS and MS/MS fragments of luteolin -3'-glucoside.

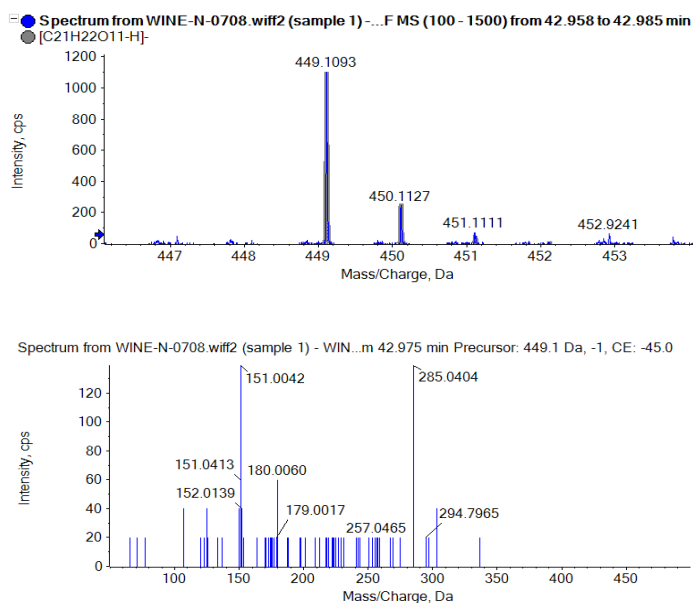

**Figure S69.** The MS and MS/MS fragments of astilbin.

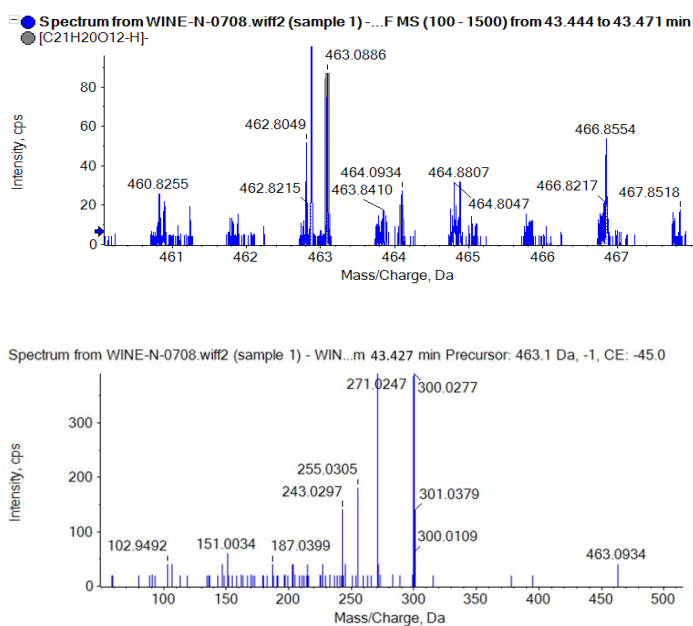

**Figure S70.** The MS and MS/MS fragments of isoquercitrin.

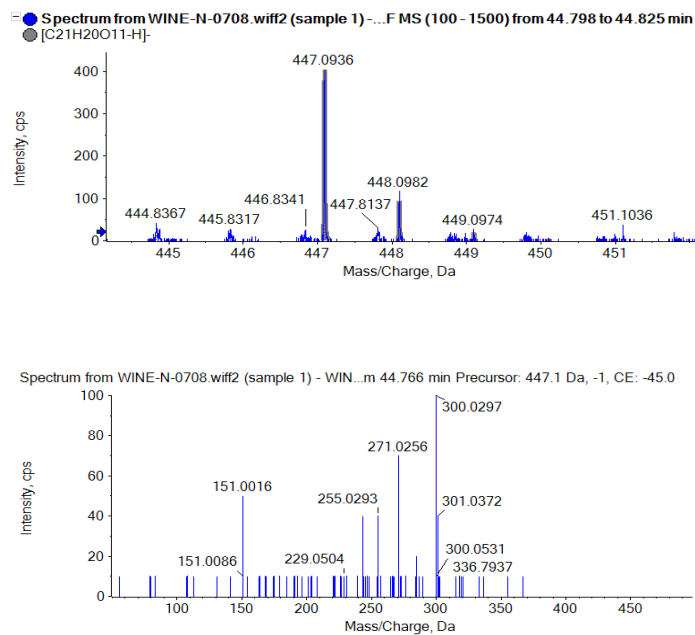

**Figure S71.** The MS and MS/MS fragments of astragalin.

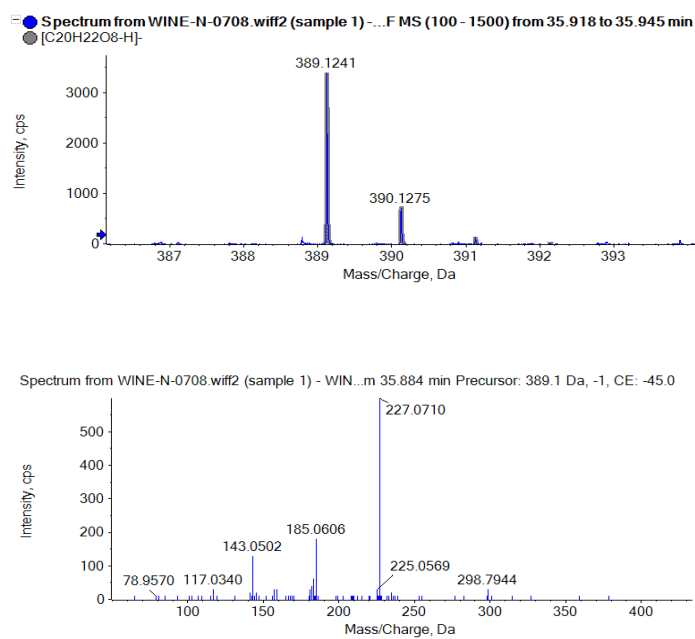

**Figure S72.** The MS and MS/MS fragments of cis-piceid.

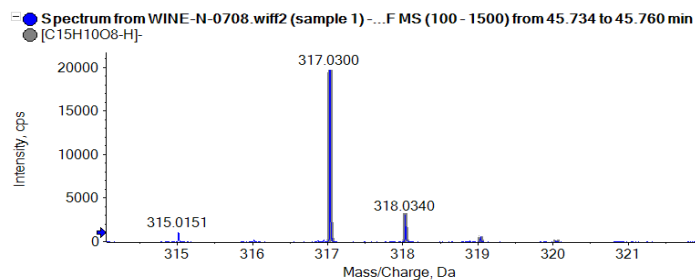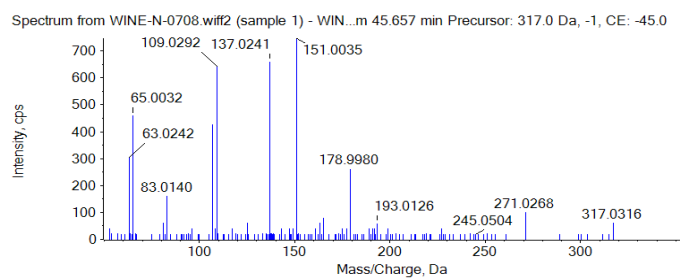

**Figure S73.** The MS and MS/MS fragments of myricetin.

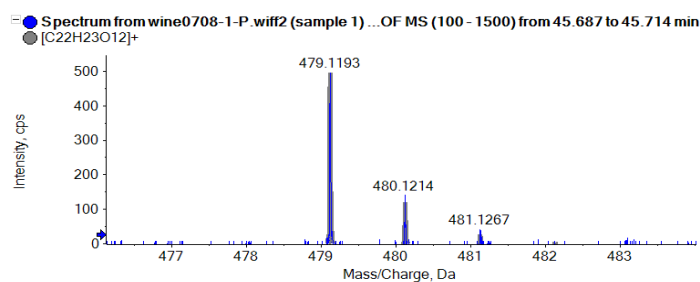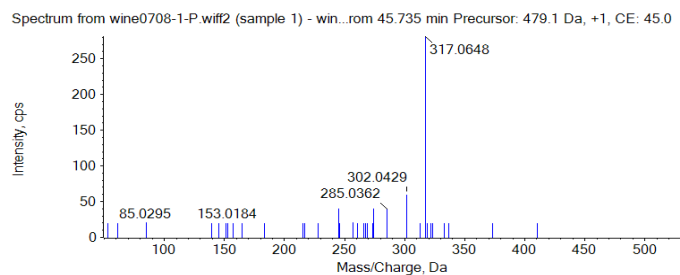

**Figure S74.** The MS and MS/MS fragments of petunidin-3-O-glucoside.

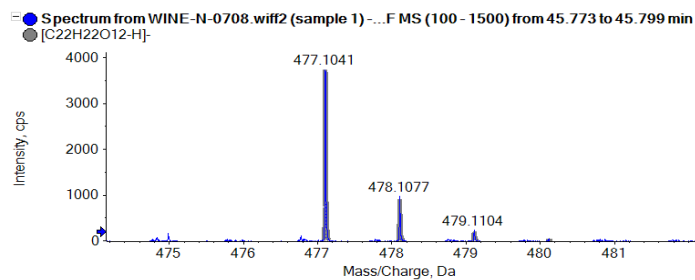

Spectrum from WINE-N-0708.wiff2 (sample 1) - WIN...m 45.752 min Precursor: 477.1 Da, -1, CE: -45.0

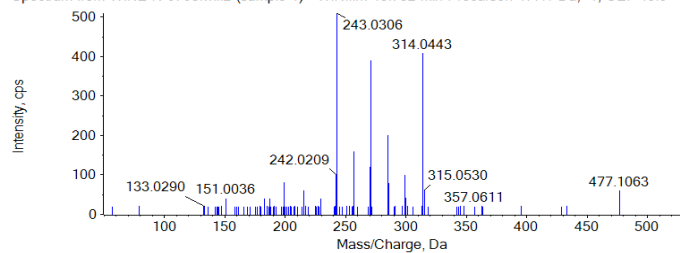

**Figure S75.** The MS and MS/MS fragments of isorhamnetin-3-O-glucoside.

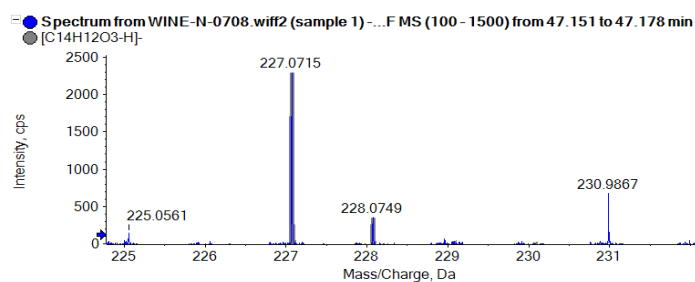

Spectrum from WINE-N-0708.wiff2 (sample 1) - WIN...m 47.181 min Precursor: 227.1 Da, -1, CE: -45.0

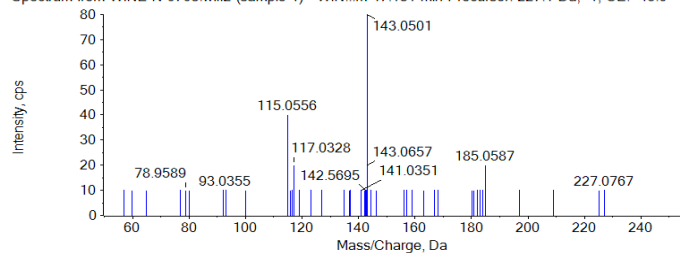

**Figure S76.** The MS and MS/MS fragments of trans-resveratrol.

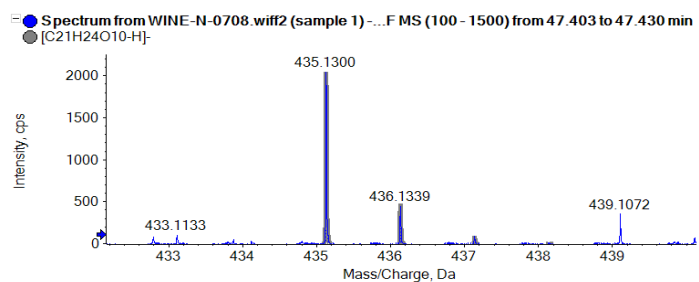

Spectrum from WINE-N-0708.wiff2 (sample 1) - WIN...m 47.395 min Precursor: 435.1 Da, -1, CE: -45.0

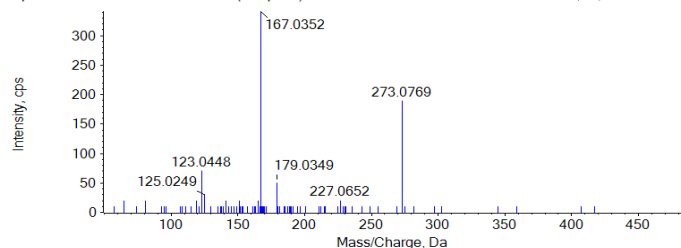

**Figure S77.** The MS and MS/MS fragments of phloridzin.

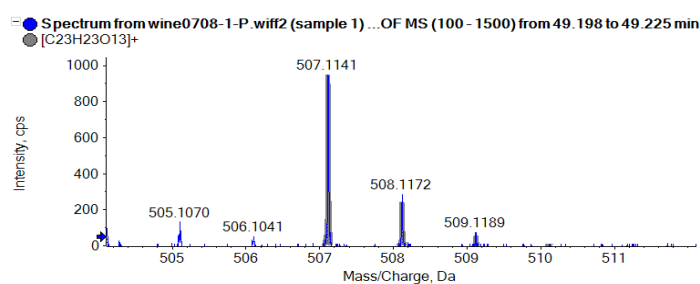

Spectrum from wine0708-1-P.wiff2 (sample 1) - win...rom 49.178 min Precursor: 507.1 Da, +1, CE: 45.0

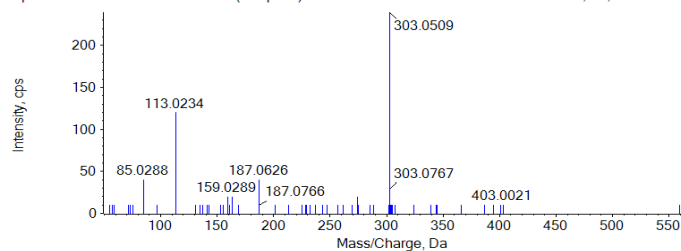

**Figure S78.** The MS and MS/MS fragments of delphindin-3-O-(6-O-acetylglucoside).

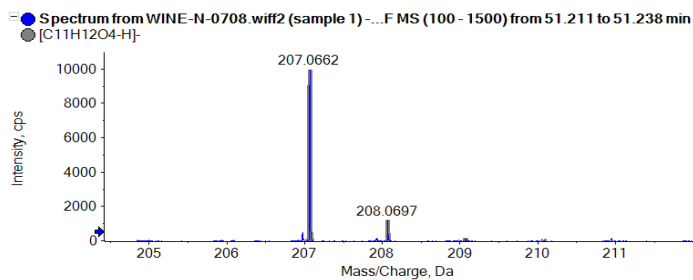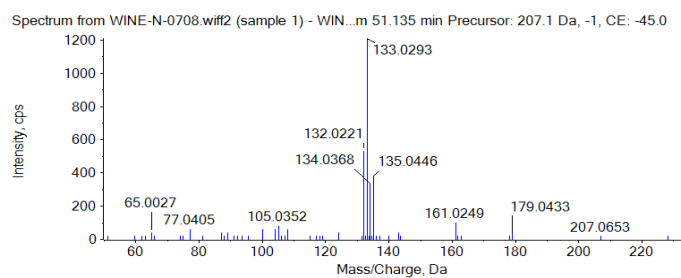

**Figure S79.** The MS and MS/MS fragments of ethyl caffeate.

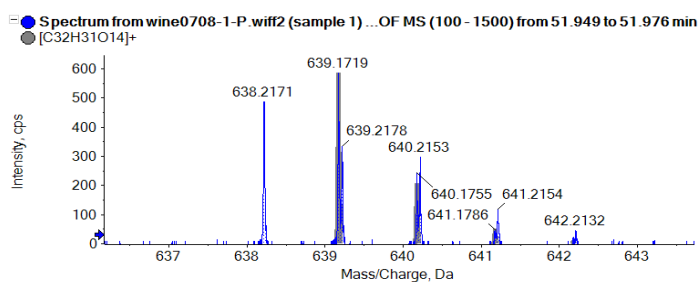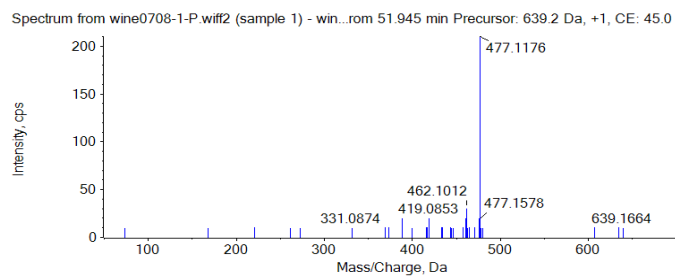

**Figure S80.** The MS and MS/MS fragments of malvidin-3-O-(6-O-coumaroyl)glucoside).

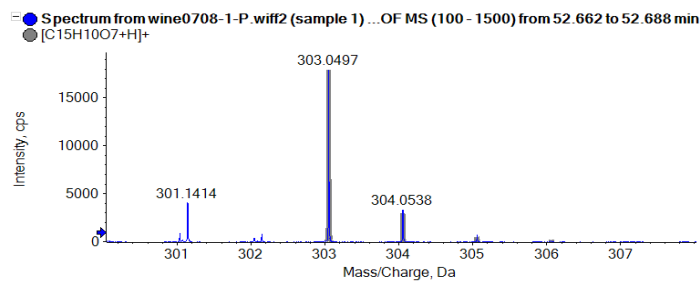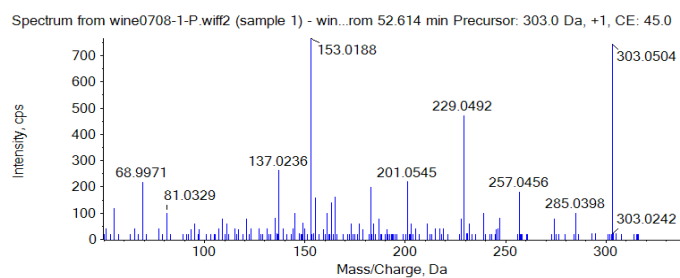

**Figure S81.** The MS and MS/MS fragments of morin.

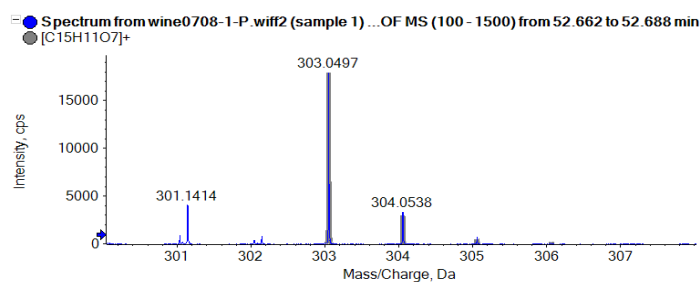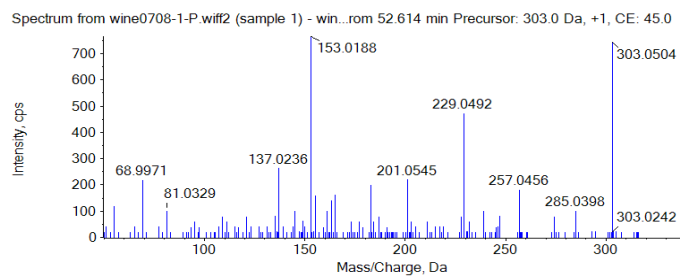

**Figure S82.** The MS and MS/MS fragments of delphinidin.



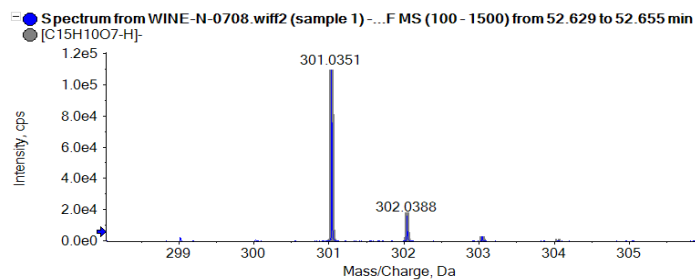

Spectrum from WINE-N-0708.wiff2 (sample 1) - WIN...m 52.618 min Precursor: 301.0 Da, -1, CE: -45.0

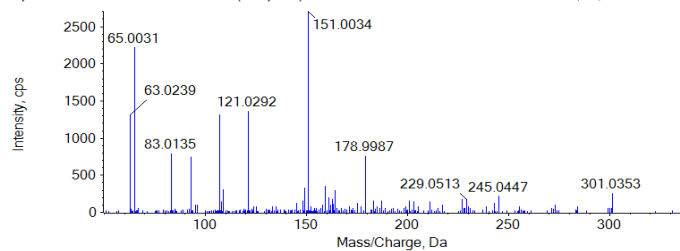

**Figure S83.** The MS and MS/MS fragments of quercetin.

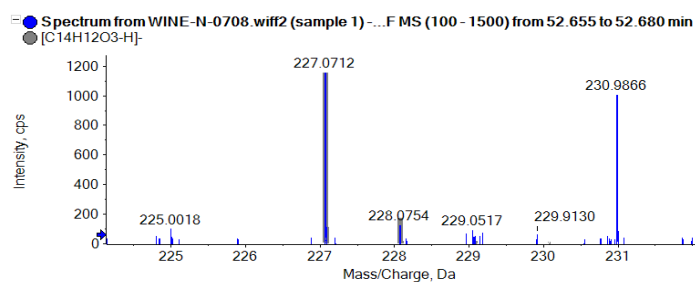

Spectrum from WINE-N-0708.wiff2 (sample 1) - WIN... from 52.643 min Precursor: 227.1 Da, CE: -45.0

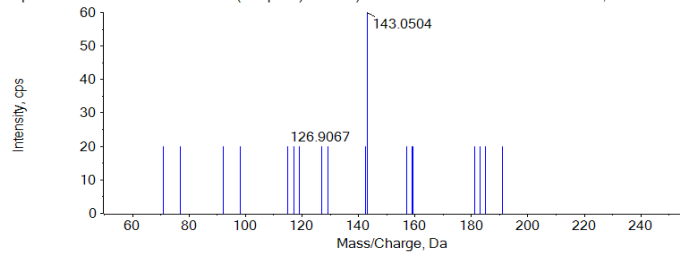

**Figure S84.** The MS and MS/MS fragments of resveratrol.

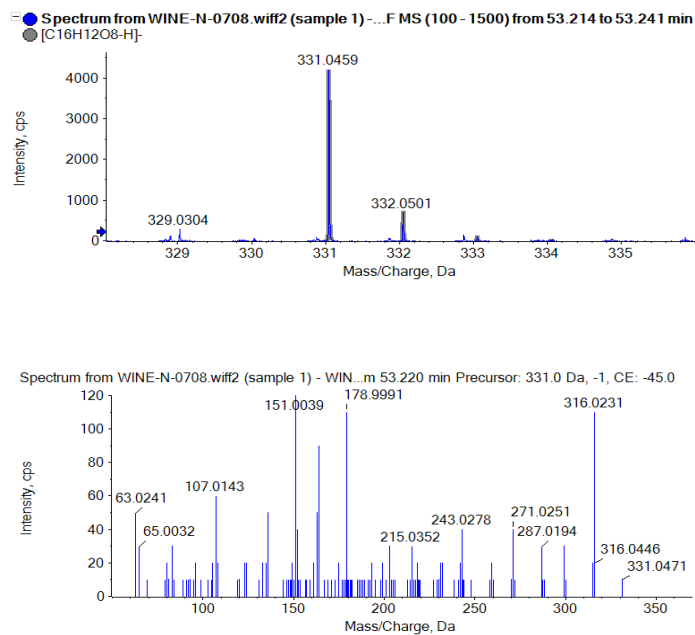

**Figure S85.** The MS and MS/MS fragments of laricitrin.

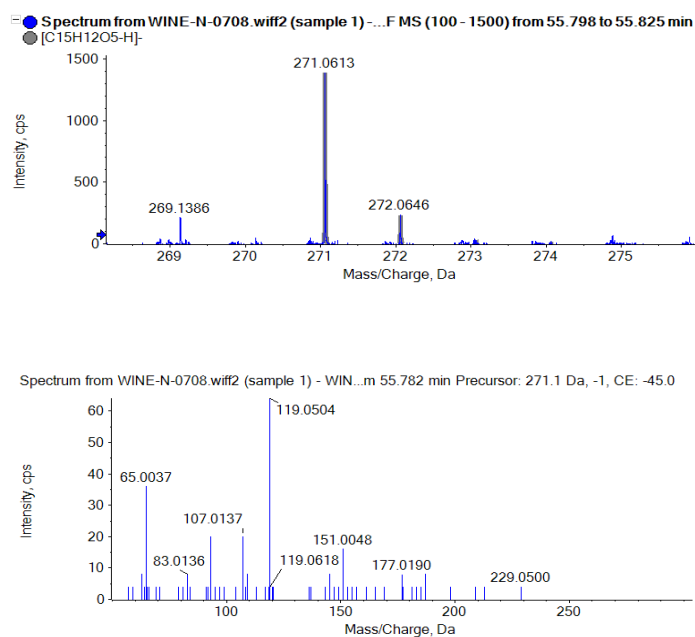

**Figure S86.** The MS and MS/MS fragments of naringenin.

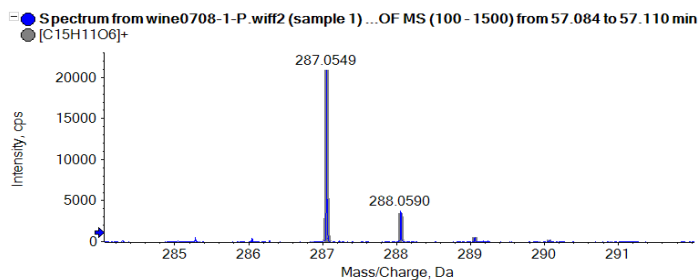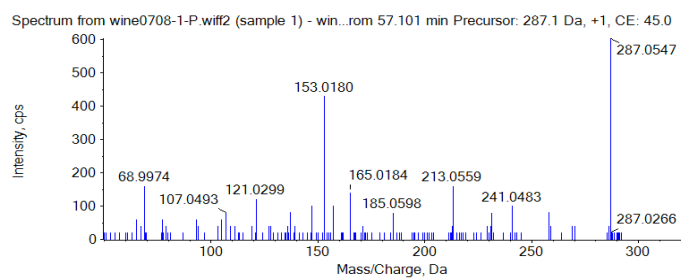

**Figure S87.** The MS and MS/MS fragments of cyanidin.

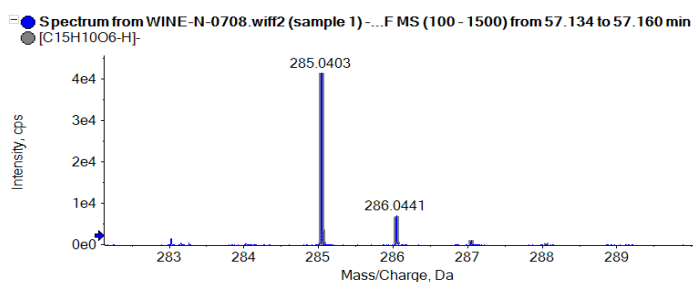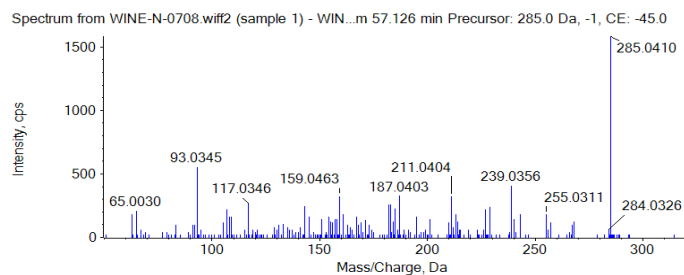

**Figure S88.** The MS and MS/MS fragments of kameferol.

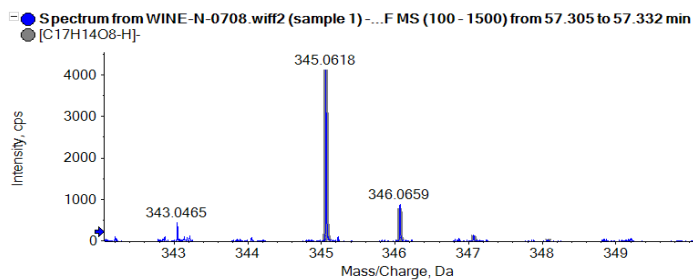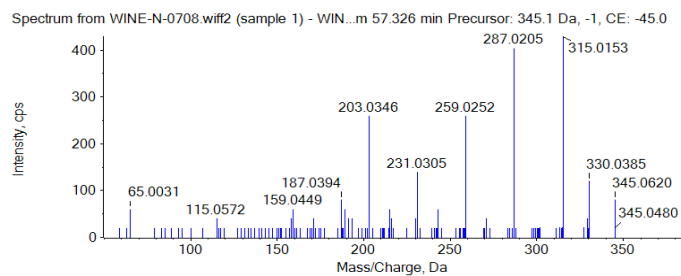

**Figure S89.** The MS and MS/MS fragments of syringetin.

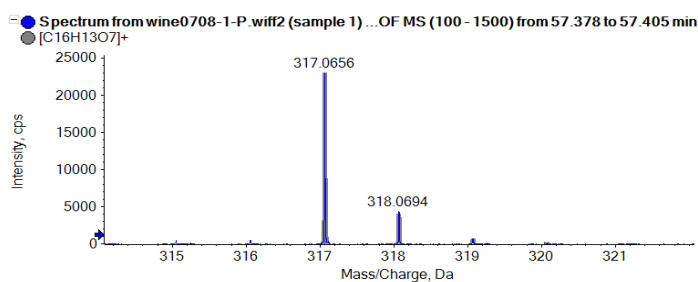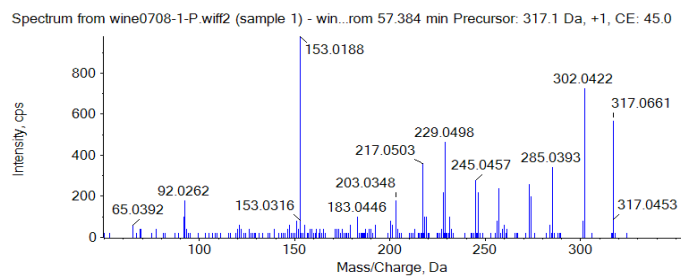

**Figure S90.** The MS and MS/MS fragments of petunidin.

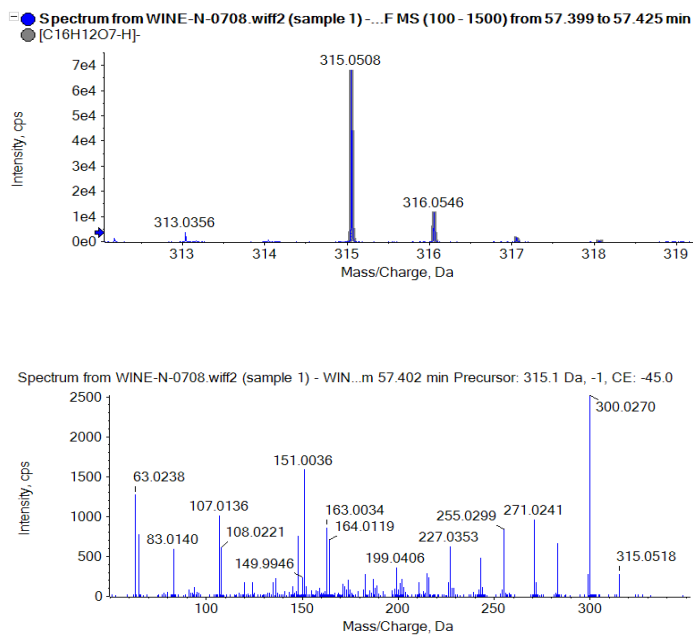

**Figure S91.** The MS and MS/MS fragments of isorhamnetin.

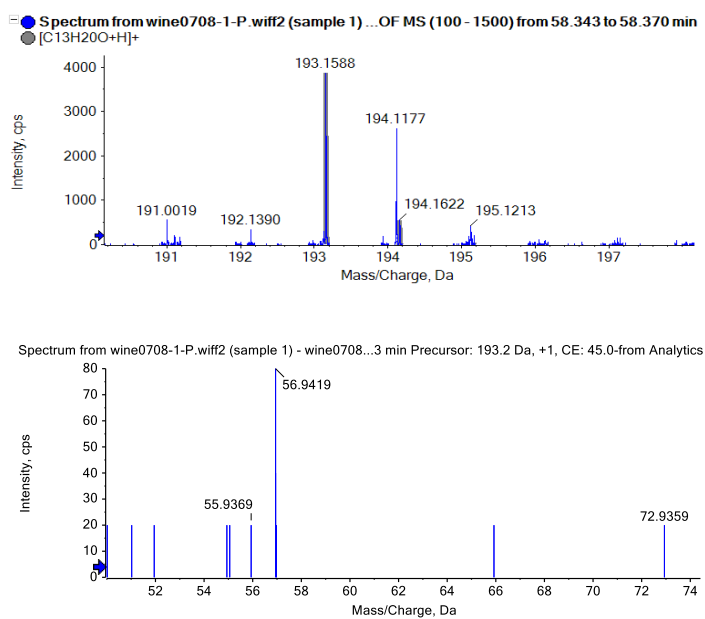

**Figure S92.** The MS and MS/MS fragments of ionone.

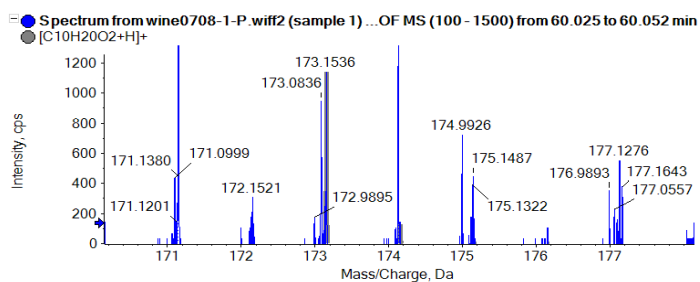

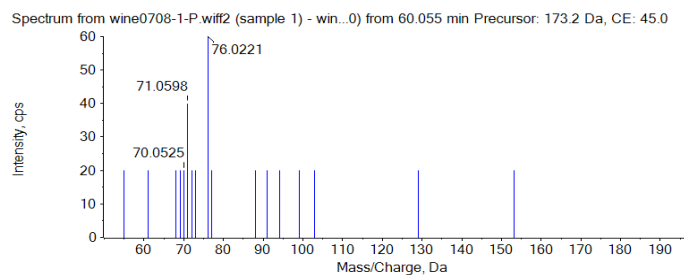

**Figure S93.** The MS and MS/MS fragments of ethyl caprylate.

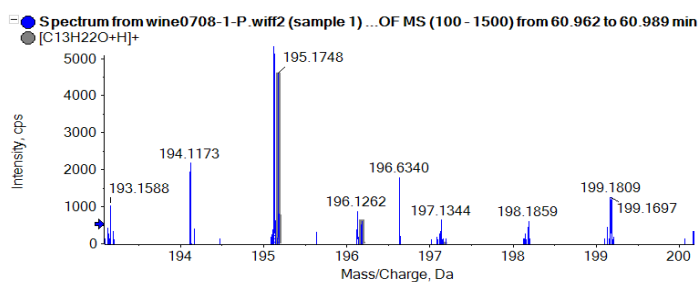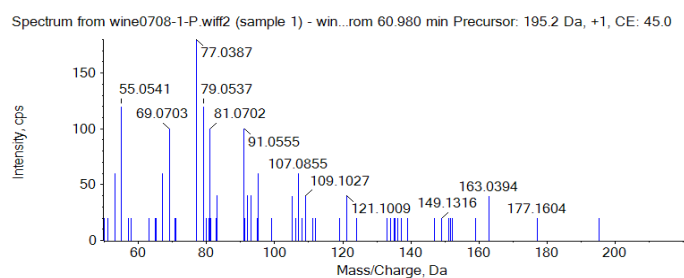

**Figure S94.** The MS and MS/MS fragments of theaspirane.
